# Supplementary material for: A one-pot reduction route to bimetallic manganese 1,8-naphthyridine complexes
Source: Royal Society of Chemistry journal article supplement (doi:10.1039/d3dt03709f), 2023-12-13
Supplement: d3dt03709f1.pdf [file d3dt03709f1.pdf]

## Electronic Supplementary Information

### A one-pot reduction route to bimetallic manganese 1,8-naphthyridine complexes

Michael A. Stevens,<sup>a</sup> Li Feng Lim,<sup>a</sup> Le Nhan Pham,<sup>b</sup> Nicholas Cox,<sup>\*a</sup> Michelle L. Coote<sup>\*b</sup> and Annie L. Colebatch<sup>\*a</sup>

#### Table of Contents

|                                                                                                     |    |
|-----------------------------------------------------------------------------------------------------|----|
| Characterisation data for [MnBr(CO) <sub>3</sub> ( <sup>Me</sup> L)] ( <b>1</b> ) .....             | 2  |
| Characterisation data for [Mn <sub>2</sub> (CO) <sub>6</sub> ( <sup>Me</sup> L)] ( <b>2</b> ) ..... | 5  |
| Characterisation data for [MnCl <sub>2</sub> ( <sup>Me</sup> L)] ( <b>3</b> ) .....                 | 5  |
| Characterisation data for [Mn <sub>2</sub> ( <sup>Me</sup> L) <sub>2</sub> ] ( <b>4</b> ) .....     | 7  |
| Crystallographic data .....                                                                         | 9  |
| Supplementary EPR data and discussion .....                                                         | 11 |
| Computational data .....                                                                            | 17 |
| XYZ coordinates .....                                                                               | 20 |
| References .....                                                                                    | 33 |

Characterisation data for  $[\text{MnBr}(\text{CO})_3(\text{MeL})]$  (**1**)

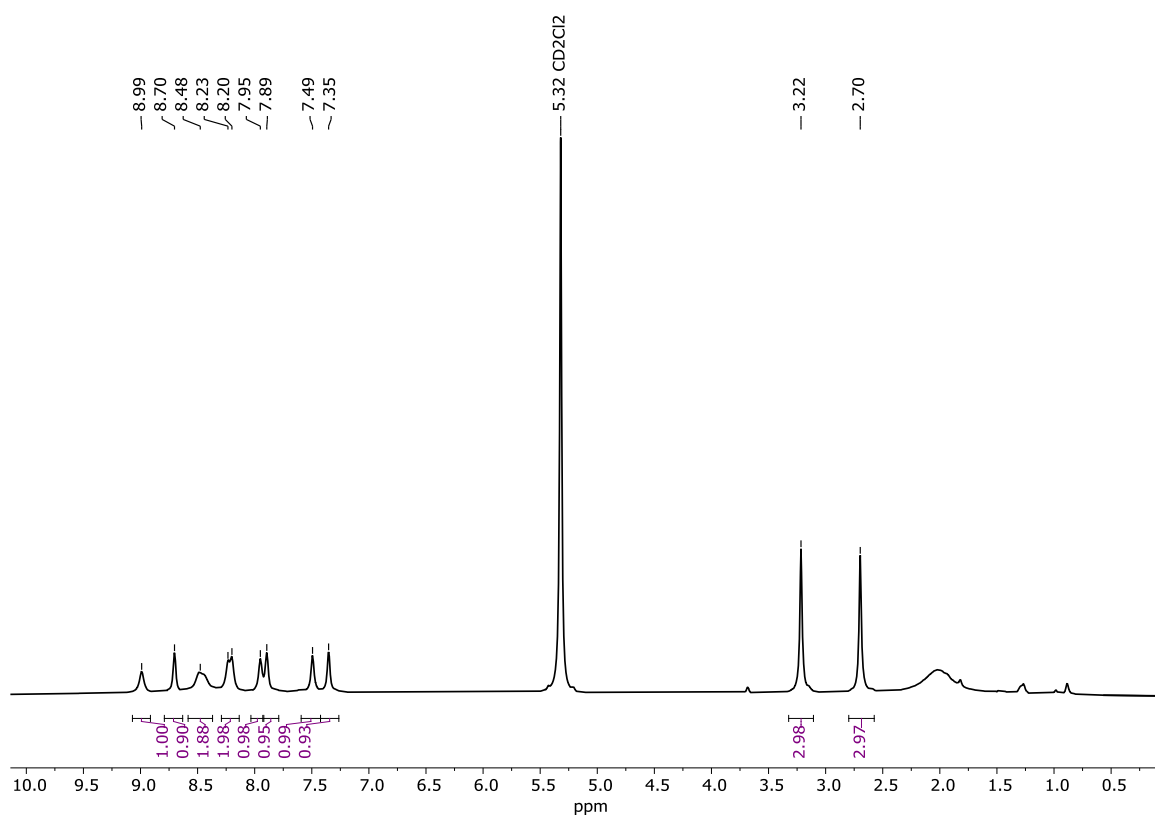

Figure S1.  $^1\text{H}$  NMR spectrum of **1** in  $\text{CD}_2\text{Cl}_2$ .

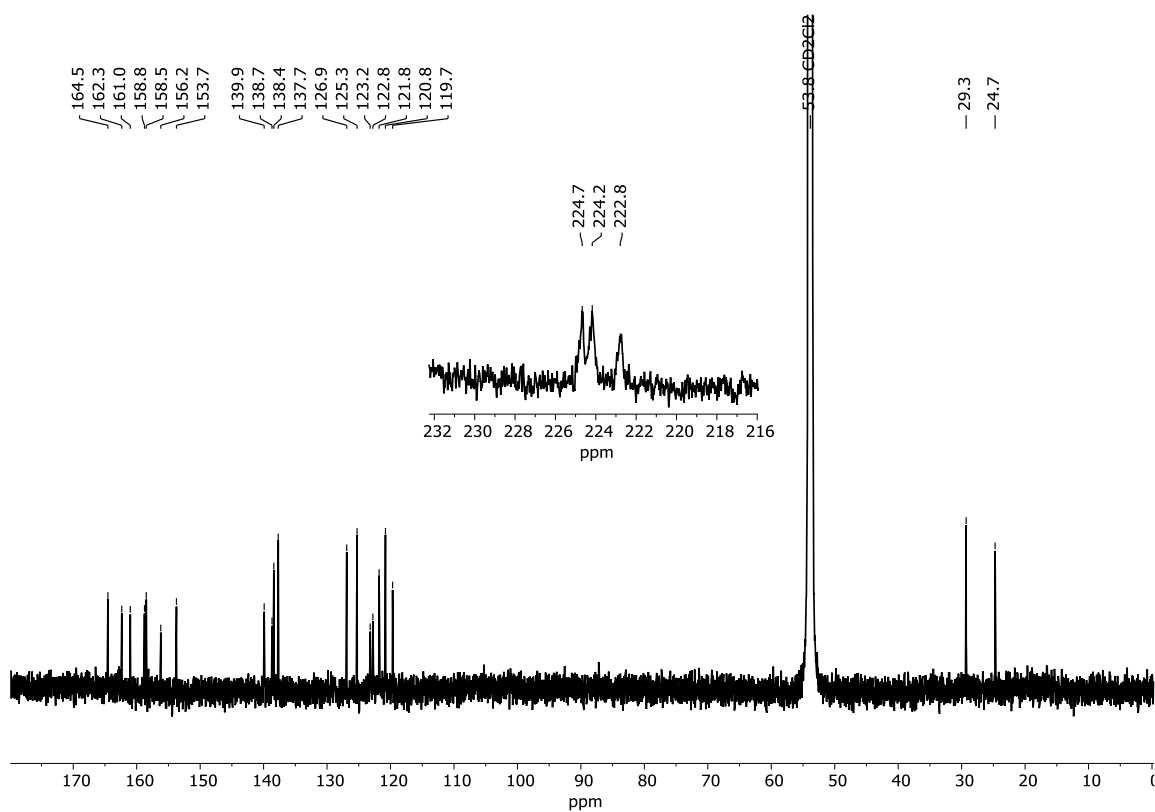

Figure S2.  $^{13}\text{C}\{^1\text{H}\}$  NMR spectrum of **1** in  $\text{CD}_2\text{Cl}_2$ . Insert: Carbonyl region of the  $^{13}\text{C}\{^1\text{H}\}$  NMR spectrum.

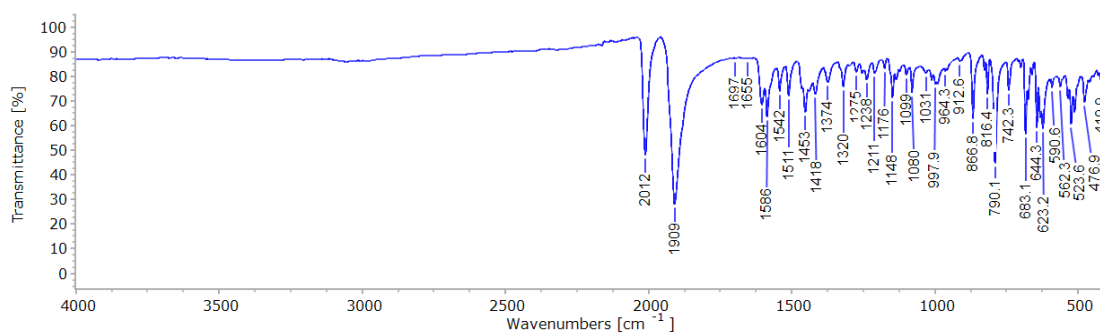

Figure S3. Solid-state IR spectrum of 1.

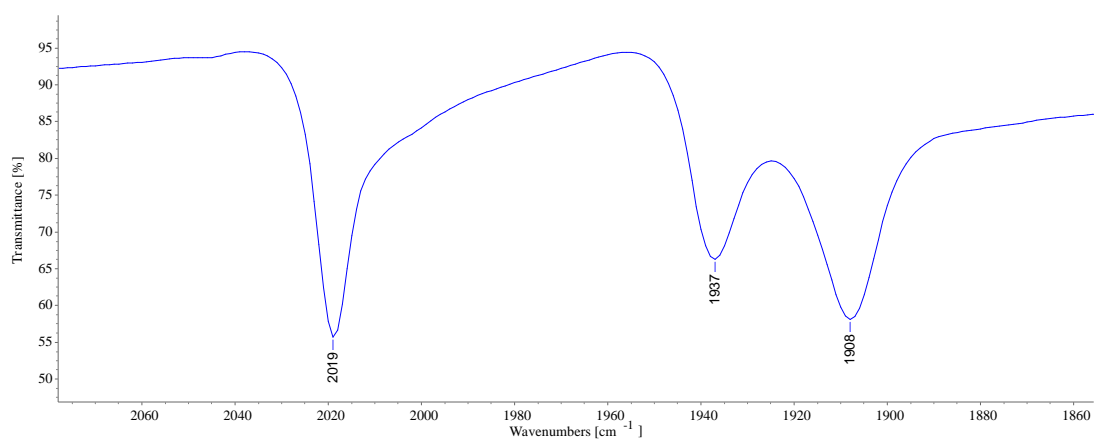

Figure S4. Solution-state IR spectrum of 1 in THF.

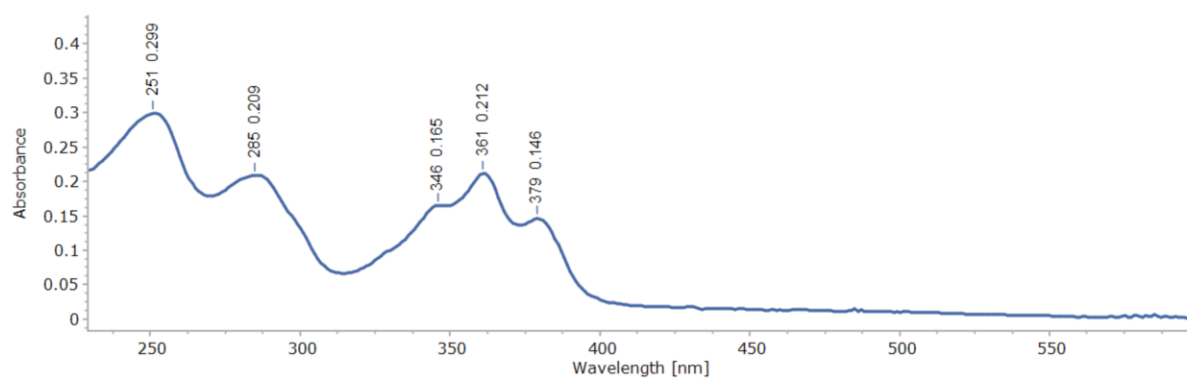

Figure S5. UV-Vis spectrum of 1 in DCM (0.01 mM).

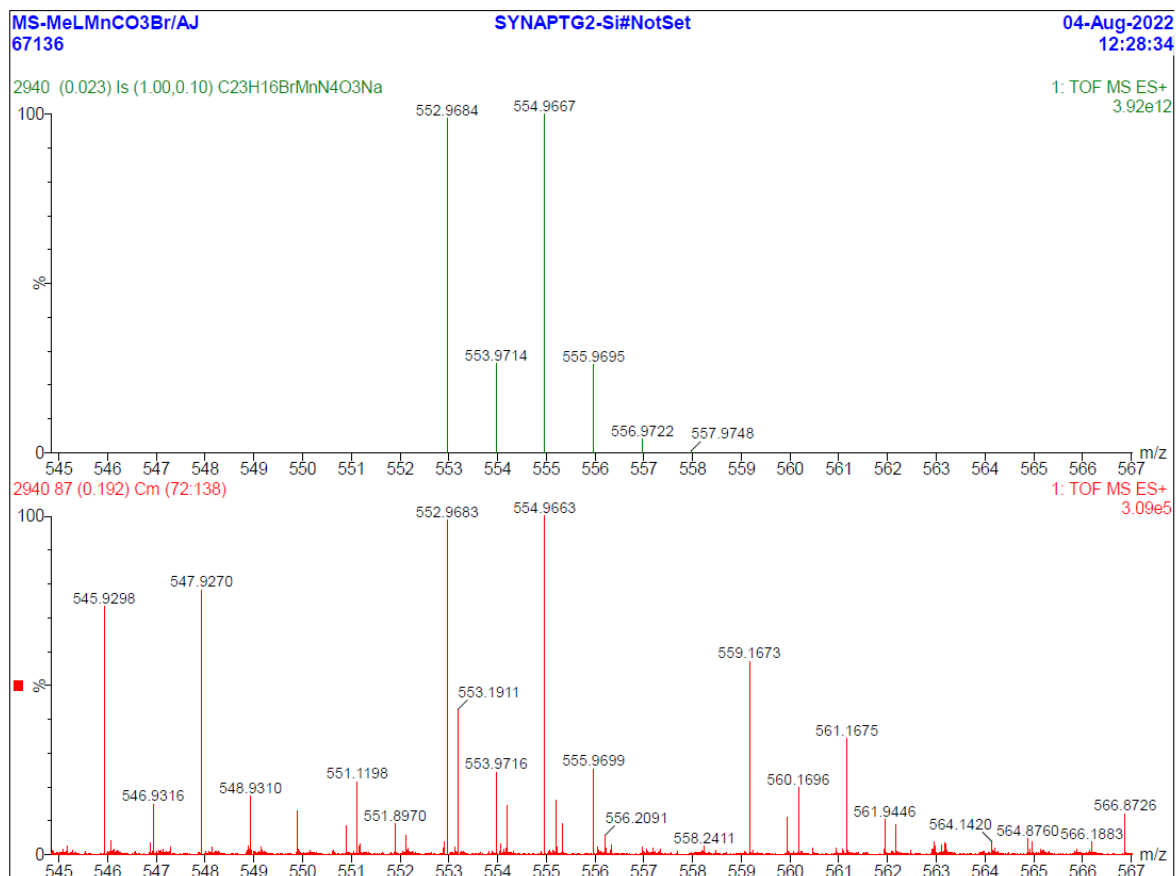

**Figure S6.** High resolution ESI mass spectrum of **1** (bottom) and simulated isotope pattern for [**1** + Na]<sup>+</sup> (top).

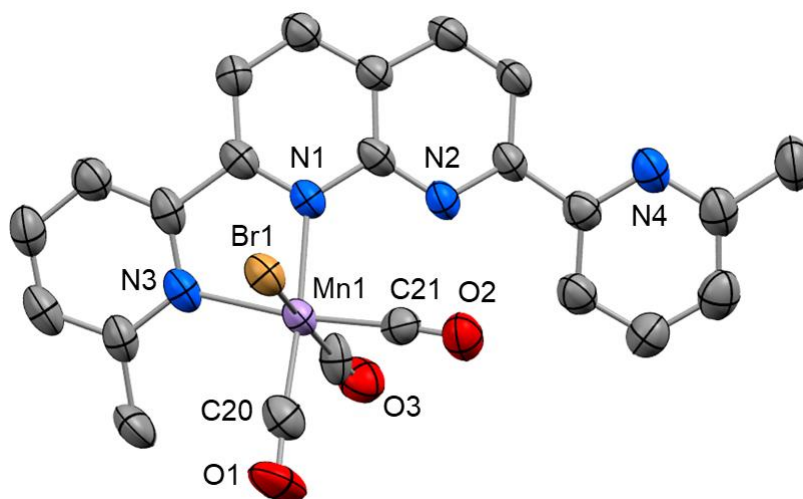

**Figure S7.** X-ray crystal structure of **1**·THF (50% displacement ellipsoids, hydrogen atoms and solvent omitted). Selected bond lengths (Å) and angles (°): Mn1–N1 2.055(6), Mn1–N3 2.092(5), Mn1–Br1 2.536(1), Mn–CO 1.814(9) – 1.830(7), N1–Mn1–N3 78.0(2).

### Characterisation data for $[\text{Mn}_2(\text{CO})_6(\text{MeL})]$ (**2**)

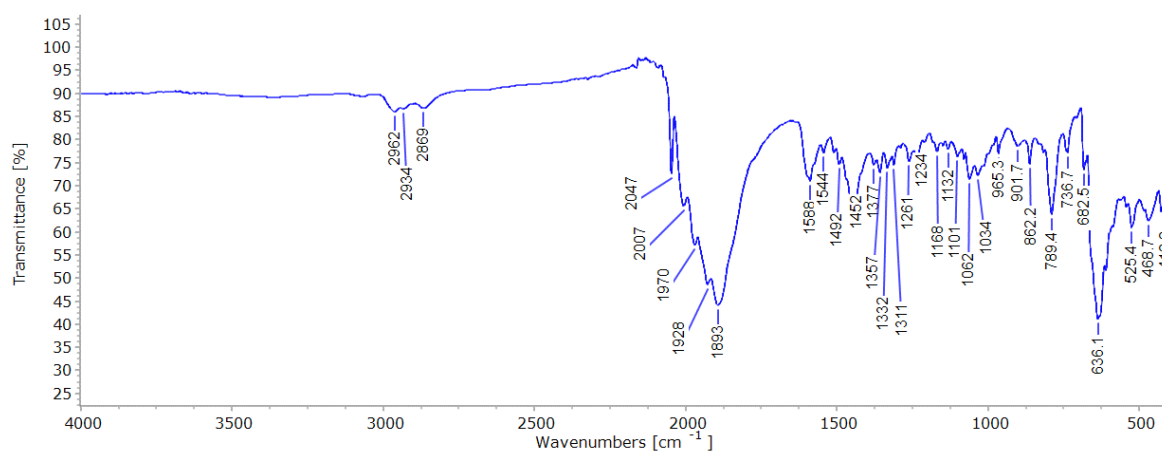

Figure S8. Solid-state IR spectrum of **2**.

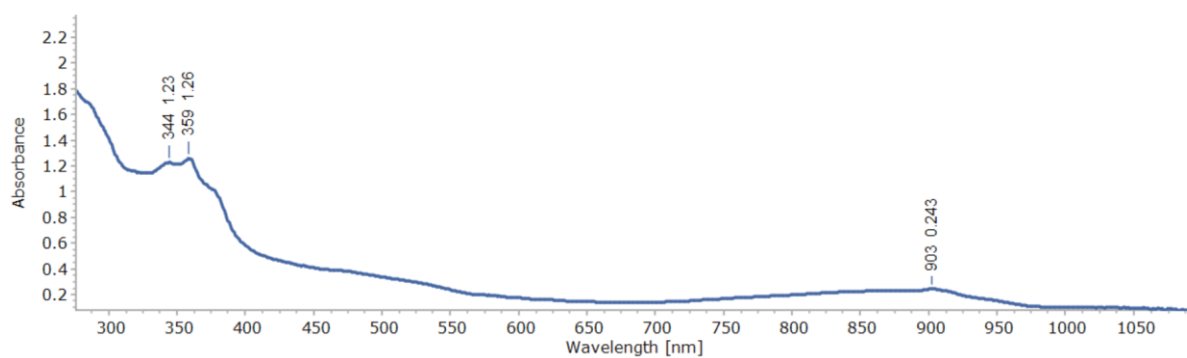

Figure S9. UV-Vis spectrum of **2** in THF (0.15 mM).

### Characterisation data for $[\text{MnCl}_2(\text{MeL})]$ (**3**)

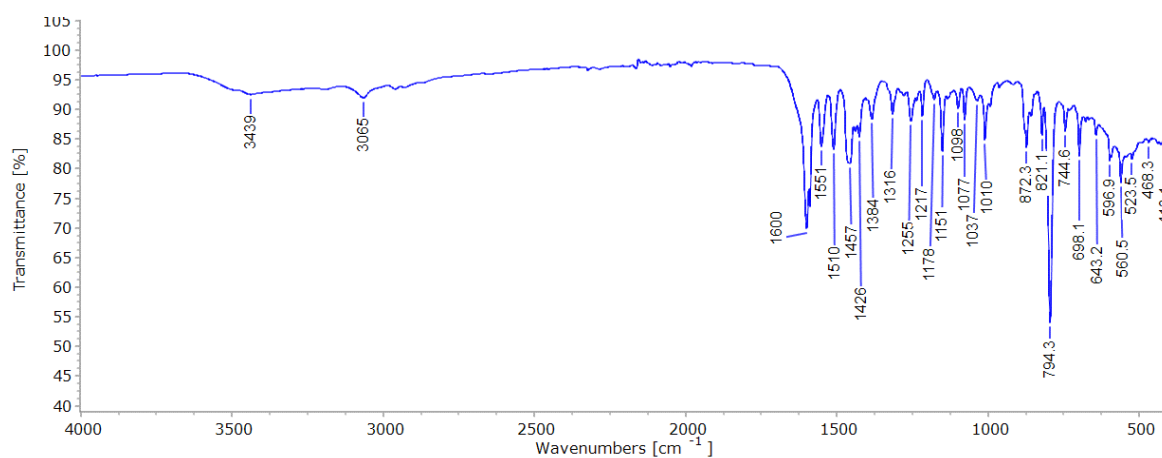

Figure S10. Solid-state IR spectrum of **3**.

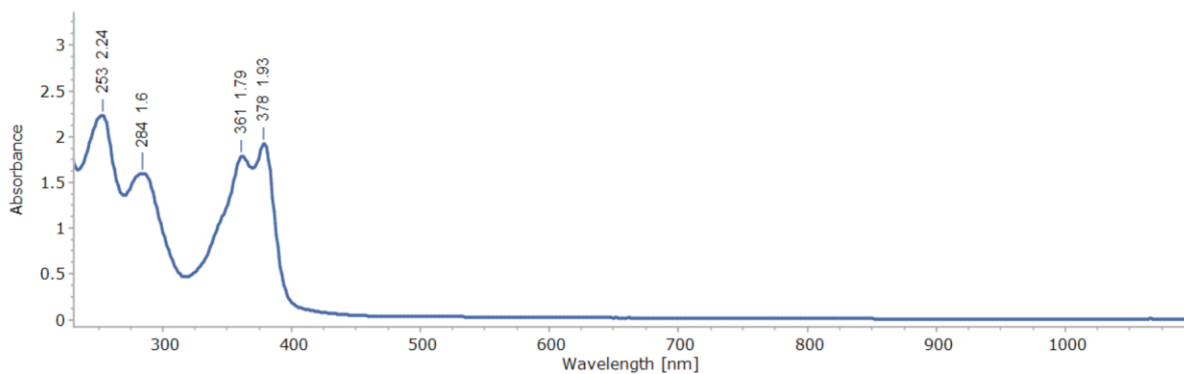

Figure S11. UV-Vis spectrum of **3** in DCM (0.1 mM).

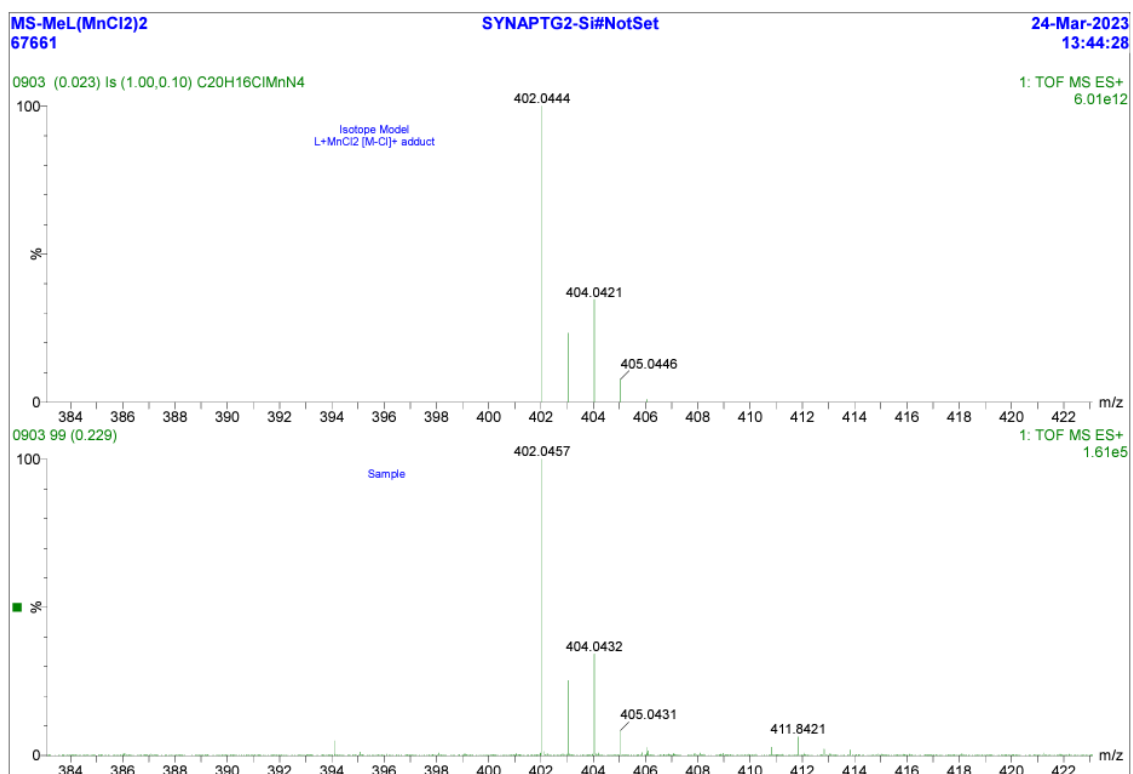

Figure S12. High resolution ESI mass spectrum of **3** (bottom) and simulated isotope pattern for  $[3 - \text{Cl}]^+$  (top).

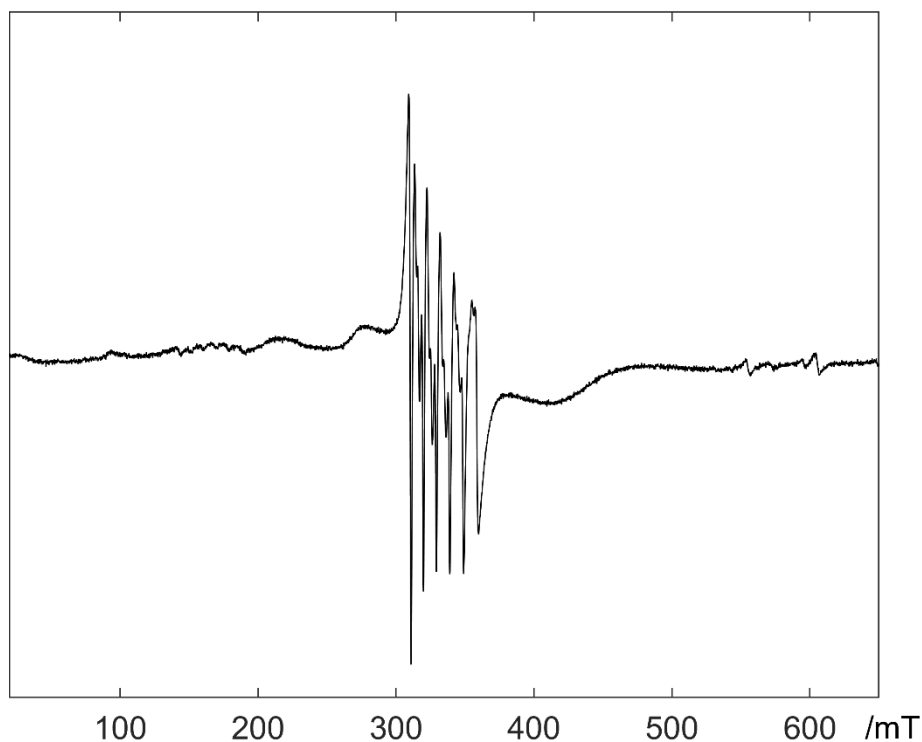

**Figure S13.** The X-band CW EPR spectrum of **3** in 2-methyl-THF at 50 K. The spectrum was acquired under non-saturating conditions with a microwave power of 0.0006325 mW and a modulation amplitude of 0.5 mT. The central six-line splitting pattern arises from hyperfine interactions to a single  $^{55}\text{Mn}$  nucleus ( $I = 5/2$ , 100% natural abundance), suggesting compound **3** retains its monometallic nature in solution.

#### Characterisation data for $[\text{Mn}_2(\text{MeL})_2]$ (**4**)

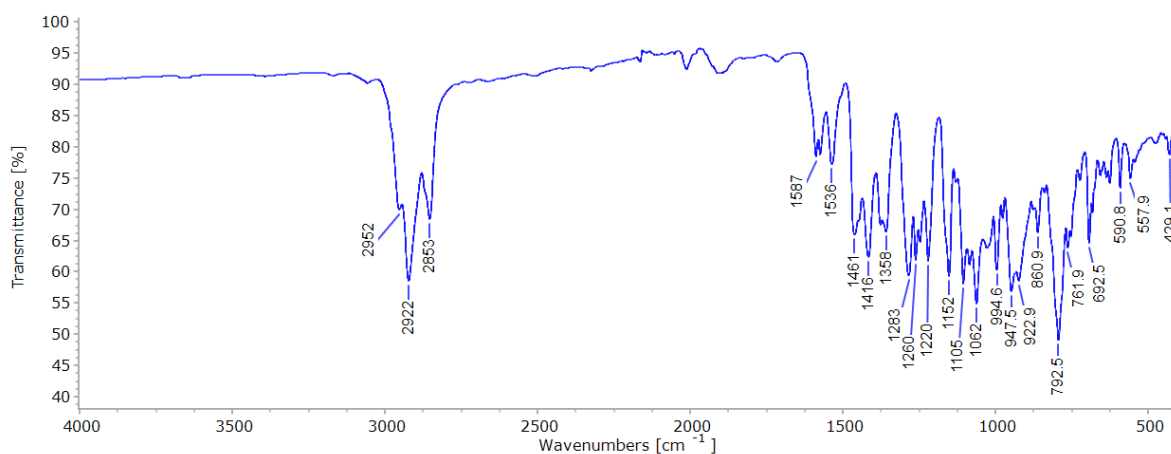

**Figure S14.** Solid-state (nujol) IR spectrum of **4**.

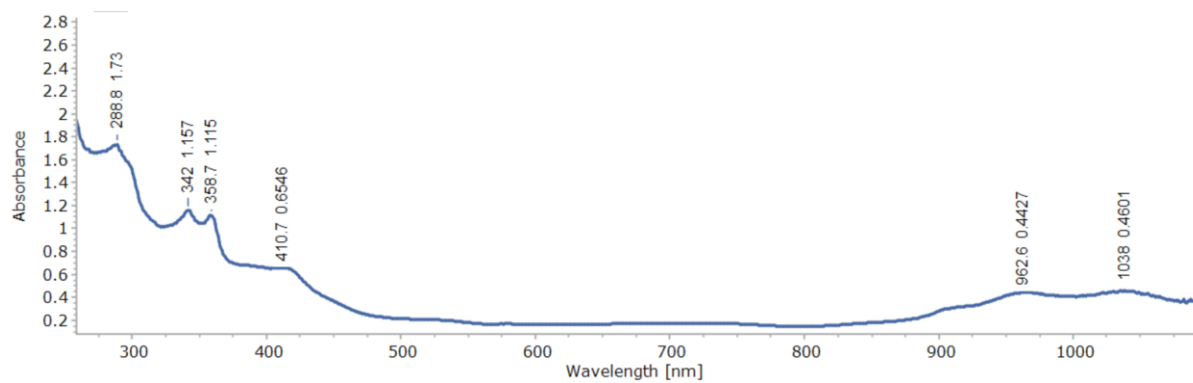

**Figure S15.** UV-Vis spectrum of **4** in THF (0.1 mM).



## Crystallographic data

**Table S1.** Summary of the crystallographic data.

|                                                 | [MnBr(CO) <sub>3</sub> ( <sup>Me</sup> L)]·THF<br>(1·THF)         | [Mn <sub>2</sub> (CO) <sub>6</sub> ( <sup>Me</sup> L)]<br>(2)                 | [MnCl <sub>2</sub> ( <sup>Me</sup> L)] <sub>2</sub> ·(CH <sub>2</sub> Cl) <sub>2</sub><br>(3 <sub>2</sub> ·(CH <sub>2</sub> Cl) <sub>2</sub> ) | [Mn <sub>2</sub> ( <sup>Me</sup> L) <sub>2</sub> ]<br>(4)        |
|-------------------------------------------------|-------------------------------------------------------------------|-------------------------------------------------------------------------------|------------------------------------------------------------------------------------------------------------------------------------------------|------------------------------------------------------------------|
| CCDC Number                                     | 2266510                                                           | 2266511                                                                       | 2266512                                                                                                                                        | 2266513                                                          |
| Chemical formula                                | C <sub>27</sub> H <sub>24</sub> BrMnN <sub>4</sub> O <sub>4</sub> | C <sub>26</sub> H <sub>16</sub> Mn <sub>2</sub> N <sub>4</sub> O <sub>6</sub> | C <sub>42</sub> H <sub>36</sub> Cl <sub>8</sub> Mn <sub>2</sub> N <sub>8</sub>                                                                 | C <sub>100</sub> H <sub>80</sub> Mn <sub>5</sub> N <sub>20</sub> |
| Formula mass                                    | 603.35                                                            | 590.31                                                                        | 1046.27                                                                                                                                        | 1836.54                                                          |
| Crystal system                                  | Triclinic                                                         | Monoclinic                                                                    | Monoclinic                                                                                                                                     | Monoclinic                                                       |
| a/Å                                             | 9.0809(7)                                                         | 15.9780(4)                                                                    | 9.89580(10)                                                                                                                                    | 30.545(6)                                                        |
| b/Å                                             | 11.6416(8)                                                        | 10.8779(2)                                                                    | 17.77790(10)                                                                                                                                   | 12.893(3)                                                        |
| c/Å                                             | 12.6776(11)                                                       | 13.9502(3)                                                                    | 25.6158(2)                                                                                                                                     | 22.833(5)                                                        |
| α/°                                             | 78.587(7)                                                         | 90                                                                            | 90                                                                                                                                             | 90                                                               |
| β/°                                             | 84.102(7)                                                         | 96.032(2)                                                                     | 91.1170(10)                                                                                                                                    | 104.52(3)                                                        |
| γ/°                                             | 81.662(6)                                                         | 90                                                                            | 90                                                                                                                                             | 90                                                               |
| Volume/Å <sup>3</sup>                           | 1296.05(18)                                                       | 2411.22(9)                                                                    | 4505.64(6)                                                                                                                                     | 8705(3)                                                          |
| Temperature/K                                   | 150                                                               | 150                                                                           | 150                                                                                                                                            | 100(2)                                                           |
| Space group                                     | P-1                                                               | C2/c                                                                          | P2 <sub>1</sub> /c                                                                                                                             | P2/c                                                             |
| Z                                               | 2                                                                 | 4                                                                             | 4                                                                                                                                              | 4                                                                |
| Radiation type                                  | Cu Kα                                                             | Cu Kα                                                                         | Cu Kα                                                                                                                                          | Synchrotron –<br>equivalent to<br>Mo Kα                          |
| Absorption<br>coefficient                       | 6.289                                                             | 8.969                                                                         | 9.260                                                                                                                                          | 0.767                                                            |
| No of reflections<br>measured                   | 7410                                                              | 7442                                                                          | 64904                                                                                                                                          | 78241                                                            |
| No of independent<br>reflections                | 4839                                                              | 2424                                                                          | 9584                                                                                                                                           | 25666                                                            |
| R <sub>int</sub>                                | 0.0425                                                            | 0.0206                                                                        | 0.0854                                                                                                                                         | 0.0691                                                           |
| Final R <sub>1</sub> values (I ><br>2σ(I))      | 0.0683                                                            | 0.0322                                                                        | 0.0682                                                                                                                                         | 0.0653                                                           |
| Final wR(F <sup>2</sup> ) values (I<br>> 2σ(I)) | 0.1744                                                            | 0.0853                                                                        | 0.1882                                                                                                                                         | 0.1979                                                           |
| Goodness of fit on F <sup>2</sup>               | 1.026                                                             | 1.058                                                                         | 1.040                                                                                                                                          | 1.042                                                            |

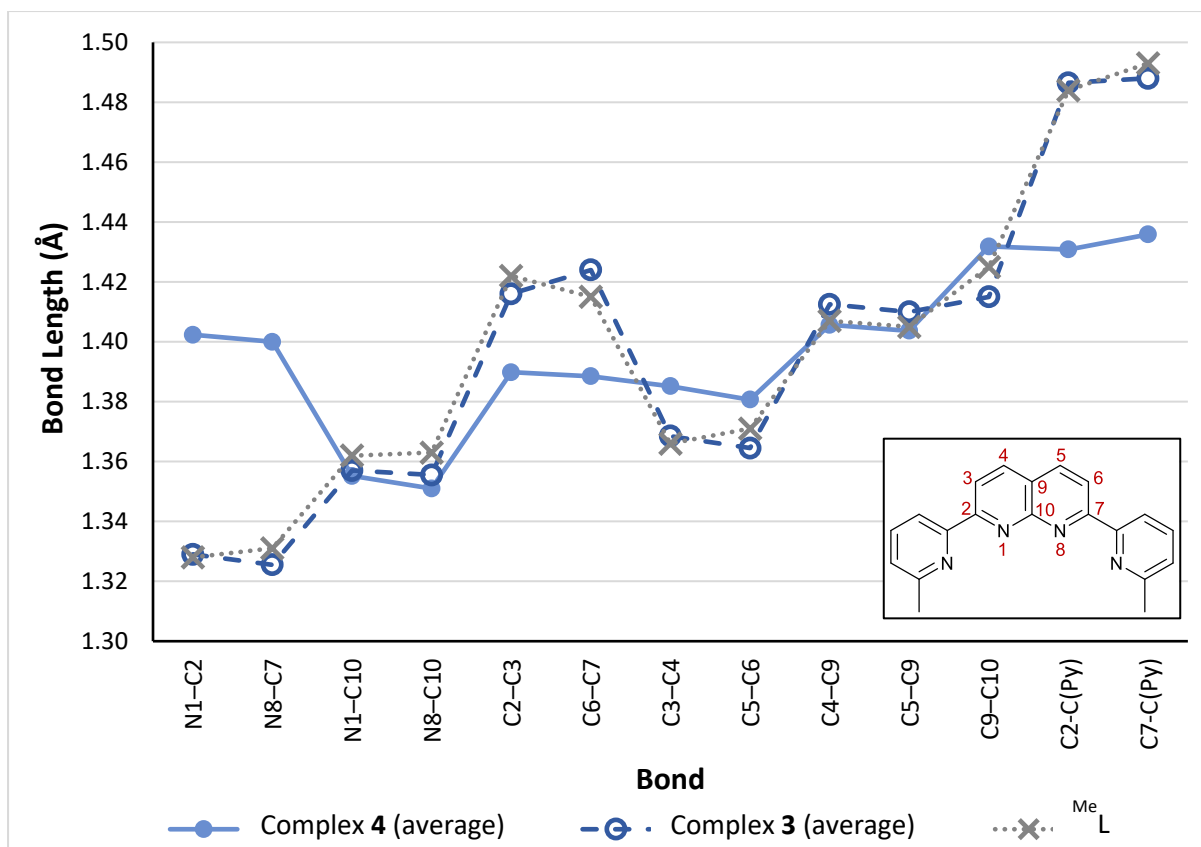

**Figure S16.** Comparison of naphthyridyl N–C and C–C bond lengths from X-ray crystallographic data for complex **4** (average of three independent **4** molecules in the unit cell), complex **3** (average of the two <sup>Me</sup>L ligands in the **3**<sub>2</sub> structure) and <sup>Me</sup>L.<sup>1</sup> Insert: Atom numbering scheme.

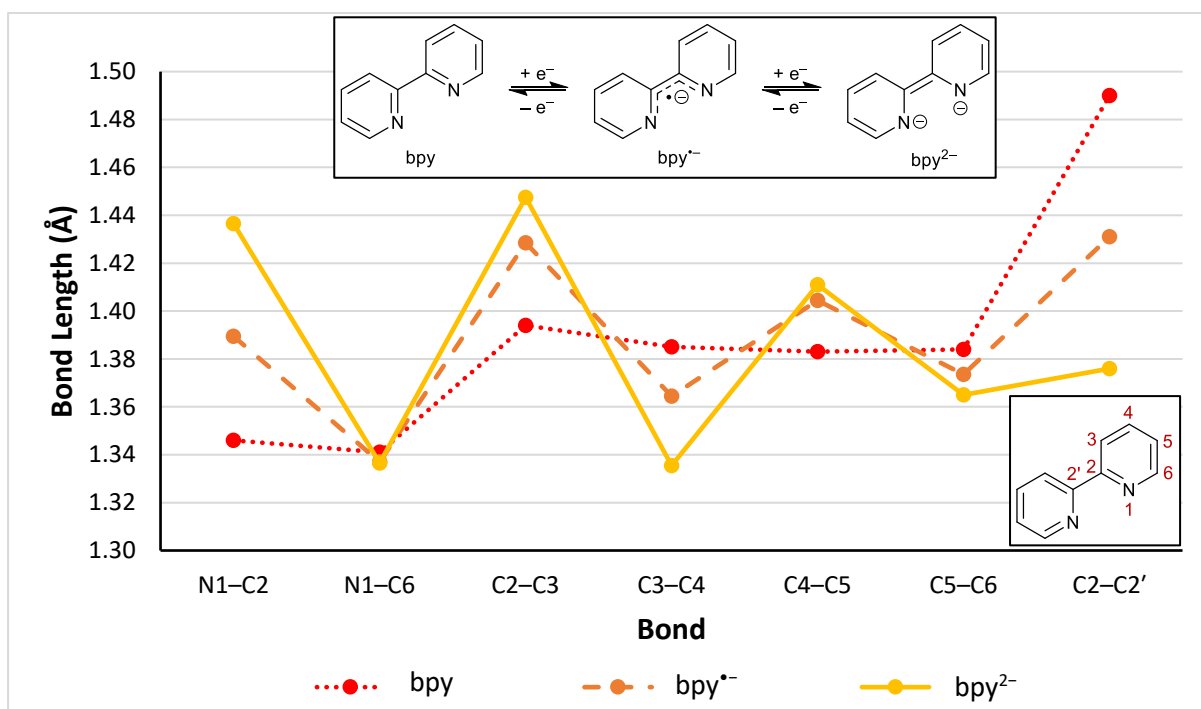

**Figure S17.** Comparison of 2,2'-bipyridine (bpy) average N–C and C–C bond lengths from X-ray crystallographic data for different bpy oxidation states.<sup>2–6</sup> Insert: bpy oxidation states (top), atom numbering scheme (bottom).

## Supplementary EPR data and discussion

**1) Spin Hamiltonian Formalism:** The basis set that describes the Mn-dimer spin manifold can be built from the product of the eigenstates of the interacting spins:

$$|S_a S_b M_a M_b I_a I_b m_a m_b\rangle \quad (\text{Eq. S1})$$

Here  $S_a$  refers to spin fragment a,  $S_b$  to spin fragment b. For a high spin Mn<sup>II</sup> both takes the value 5/2. For a high spin Mn<sup>0</sup> both take the value 3/2.  $M_a$  and  $M_b$  refers to the electronic magnetic sub-level,  $-S_i, 1-S_i, \dots, S_i-1, S_i$ ;  $I_i$  takes the value 5/2; and the corresponding  $m_i$  terms the values  $-I_i, 1-I_i, \dots, I_i-1, I_i$ .

The full spin Hamiltonian that describes the spin manifold is:

$$\begin{aligned} \hat{H} = & -2J\vec{S}_a \cdot \vec{S}_b + \vec{S}_a \cdot \mathbf{d}_{ab} \cdot \vec{S}_b + \vec{S}_a \cdot \mathbf{d}_a \cdot \vec{S}_a + \vec{S}_b \cdot \mathbf{d}_b \cdot \vec{S}_b + \beta\vec{B}_0 \cdot \mathbf{g}_a \cdot \vec{S}_a + \beta\vec{B}_0 \cdot \mathbf{g}_b \cdot \vec{S}_b \\ & -g_n\beta_n\vec{B}_0 \cdot \vec{I}_a - g_n\beta_n\vec{B}_0 \cdot \vec{I}_b + \vec{S}_a \cdot \mathbf{a}_a \cdot \vec{I}_a + \vec{S}_b \cdot \mathbf{a}_b \cdot \vec{I}_b \end{aligned} \quad (\text{Eq. S2})$$

It contains: i) a magnetic exchange coupling term, parameterized in terms of  $J$ ; ii) an electronic dipolar coupling term, parameterized in terms of  $d_{ab}$ , which itself is constrained by the distance between the two Mn ions; iii) second order zero field splitting terms, describing splitting of energy levels of each spin fragment (a and b) at zero-field; iv) the electron Zeeman terms describing the electron spin interaction of each spin fragment (a and b) with the applied magnetic field; v) the set of nuclear Zeeman terms, describing the interaction of each <sup>55</sup>Mn nucleus with the applied magnetic field and; vi) the set of hyperfine terms describing the interaction between the electron spin fragment *a or b* and each <sup>55</sup>Mn nucleus  $I_i$ .

Owing to the symmetry of the system we used the following approximations. We also assume that dipolar coupling between the two Mn sites ( $d_{ab}$ ) is significantly smaller than that of the exchange coupling or the zero-field splitting of each site i.e. for a distance of 3.17 Å the electron-electron dipolar coupling is 1600 MHz and thus set to be zero.

$$\begin{aligned} \mathbf{d} &= \mathbf{d}_a = \mathbf{d}_b \\ \mathbf{g} &= \mathbf{g}_a = \mathbf{g}_b \\ \mathbf{a} &= \mathbf{a}_a = \mathbf{a}_b \\ \mathbf{d}_{ab} &= 0 \end{aligned} \quad (\text{Eqs. S3})$$

Note too that the zero field splitting term of each spin fragment can be expressed in terms of two parameters ( $d_a$  and  $e_a$ ):

$$\vec{S}_a \cdot \mathbf{d}_a \cdot \vec{S}_a = d_a \left[ \vec{S}_{a,z}^2 - \frac{1}{3}S_a(S_a + 1) + \frac{e_a}{d_a} (\vec{S}_{a,x}^2 - \vec{S}_{a,y}^2) \right] \quad (\text{Eq. S4})$$

In the instance where the first term of the spin Hamiltonian is large (strong exchange limit), the spin manifold can be described in terms of a set of spin sub-manifolds which each having a net (effective) spin.

$$\hat{H} = -2J\vec{S}_a \cdot \vec{S}_b \quad (\text{Eq. S5})$$

The effective spin states for a  $S_a = S_b = 3/2$  dimer are:

$$S = |S_a + S_b\rangle, |S_a + S_b - 1\rangle \dots \dots \dots |S_a - S_b\rangle = 3, 2, 1 \text{ and } 0$$

And the energy levels of the spin ladder are determined by:

$$E(S) = -JS(S + 1) \quad (\text{Eq. S6})$$

The sign of  $J$  determines which of the effective spin states is the lowest in energy. For an antiferromagnetic interaction between the two sites (negative  $J$ ), the  $S = 0$  spin state is the lowest in energy, whereas for a ferromagnetic interaction between the two sites (positive  $J$ ), the  $S = 3$  state is the lowest in energy.

The basis set that describes each spin sub-manifold product of the effective spin eigenstate with that of the two nuclear spin eigenstates:

$$|S \ M_S \ I_a \ I_b \ m_a \ m_b\rangle \quad (\text{Eq. S7})$$

And the effective spin Hamiltonian that describes each spin sub-manifold is:

$$\hat{H}_S = \vec{S} \cdot \mathbf{D} \cdot \vec{S} + \beta \vec{B}_0 \cdot \mathbf{G} \cdot \vec{S} + \sum_{i=a,b} (-g_n \beta_n \vec{B}_0 \cdot \vec{I}_i + \vec{S} \cdot \mathbf{A} \cdot \vec{I}_i) \quad (\text{Eq. S8})$$

It contains: i) a second order zero field splitting terms, describing splitting of energy levels of the spin sub-manifold at zero-field; ii) the electron Zeeman terms describing the interaction of the effective electron spin with the applied magnetic field; iii) the set of nuclear Zeeman terms, describing the nuclear spins interaction with the applied magnetic field and; iv) the set of hyperfine term describing the interaction between the effective electron spin and each nuclear spins  $I_i$ .

The spin Hamiltonian tensors  $\mathbf{D}$ ,  $\mathbf{G}$  and  $\mathbf{A}$  that describe the system in the strong exchange limit are a weighted sum of the spin Hamiltonian parameters of the individual spin fragments a and b. For an exchange coupled dimer  $\mathbf{D}$ ,  $\mathbf{G}$  and  $\mathbf{A}$  are equal to:

$$\mathbf{D} = \kappa_a \mathbf{d}_a + \kappa_b \mathbf{d}_b + \kappa_{ab} \mathbf{d}_{ab} = 2\kappa_a \mathbf{d}$$

$$\mathbf{G} = c_a \mathbf{g}_a + c_b \mathbf{g}_b = 2c_a \mathbf{g}$$

$$\mathbf{A} = c_a \mathbf{a}_a + c_b \mathbf{a}_b = 2c_a \mathbf{a}$$

(Eqs. S9)

Table S2 lists set of weights (spin projection factors) for a  $\text{Mn}^{\text{II}}\text{Mn}^{\text{II}}$  dimer ( $S_a = 5/2$ ,  $S_b = 5/2$ ) and for a  $\text{Mn}^0\text{Mn}^0$  dimer ( $S_a = 3/2$ ,  $S_b = 3/2$ ).

**Table S2.** Spin projection coefficients for homovalent exchange coupled dimers.<sup>7</sup>

| $S_1, S_2$ |            | $S_T = 1$ | $S_T = 2$  | $S_T = 3$   | $S_T = 4$ | $S_T = 5$ |
|------------|------------|-----------|------------|-------------|-----------|-----------|
| 3/2, 3/2   | $C_a, C_b$ | 0.5       | <b>0.5</b> | 0.5         | -         | -         |
|            | $K_a, K_b$ | -1.2      | <b>0.0</b> | 0.2         | -         | -         |
|            | $K_{ab}$   | 1.7       | <b>0.5</b> | 0.3         | -         | -         |
| 5/2, 5/2   | $C_a, C_b$ | 0.5       | 0.5        | <b>0.5</b>  | 0.5       | 0.5       |
|            | $K_a, K_b$ | 3.2       | 0.48       | <b>0.02</b> | 0.14      | 0.22      |
|            | $K_{ab}$   | 3.7       | 0.98       | <b>0.52</b> | 1.25      | 0.28      |

**2) Simulating the EPR spectrum.** As briefly described in the main text, the Mn dimer species (4) displays two EPR signals:

- A multiline signal, centred at  $g = 2$  with resolved  $^{55}\text{Mn}$  hyperfine structure – at least 19 peaks are observed
- A broader EPR signal with two intense turning points at  $g = 5.1$  and  $2.0$ .

The lineshape of both are indicative of a coupled dimer. A detailed explanation of this is given below. All EPR simulations reported use the Easyspin package<sup>8</sup> implemented in MATLAB.

**2.1) The multiline EPR signal.** The multiline EPR signal observed is reminiscent of that seen for a  $\text{Mn}^{\text{II}}\text{Mn}^{\text{II}}$  dimer.<sup>9–11</sup> For such dimers, the exchange coupling between the two metal ions is typically much larger than that of the zero-field splitting (ZFS) of each Mn ion, as high spin  $\text{Mn}^{\text{II}}$  characteristically exhibits small ZFSs ( $d < 1$  GHz,  $0.03$  cm<sup>-1</sup>). As such, the EPR signals of exchange coupled  $\text{Mn}^{\text{II}}\text{Mn}^{\text{II}}$  dimers are described in terms of effective spin states and their EPR spectra simulated using an effective spin Hamiltonian (Eq. S8) – see the left-hand side of Figure S19.

For an  $\text{Mn}^{\text{II}}\text{Mn}^{\text{II}}$  dimer, the multiline signal is predominately associated with the  $S = 3$  spin-submanifold. For this effective spin sub-manifold, the spin projection factors the site zero field splitting of the two Mn ions are approximately zero, leading to this submanifold resolving a narrow EPR signal centered at  $g = 2$ . The  $^{55}\text{Mn}$  hyperfine coupling observed for the coupled spin system is approximately half that seen for a monomeric species. This is because the spin projection factor for each Mn ion is  $\frac{1}{2}$ , regardless of the effective spin state (see spin Hamiltonian formalism section, Table S2). This leads to a 11-line multiline pattern with a peak-to-peak splitting of approximately 4.5 mT. For a corresponding  $\text{Mn}^{\text{0}}\text{Mn}^{\text{0}}$  dimer there also exists an effective spin submanifold with similar properties to that of the  $S = 3$  sub-manifold of the  $\text{Mn}^{\text{II}}\text{Mn}^{\text{II}}$  dimer. It is the  $S = 2$  spin submanifold (see Table S2). It too will have spin projection factors the site zero field splitting of the two Mn ions are zero, leading to narrow EPR signal centered at  $g = 2$ .

**2.2) The broad EPR spectrum.** The broad EPR spectrum resembles that of  $S = 3/2$  species in the weak field regime i.e. ( $d > g\beta H \approx 0.3$  cm<sup>-1</sup>), resolving an intense absorptive feature at  $g=5$  and a derivative feature at  $g=2$ . The energy-levels of such a system can be described in term of two isolated Kramer's doublets, with the EPR signal arising from transition within these doublets. The position of the low field turning point and the presence of a second turning point in the  $g=2$  region both constrain the  $d$  tensor to be rhombic ( $e/d = 0.33$ ). A simulation of the spectrum assuming a single (isolated)  $S=3/2$  spin system is shown in the main text.

While most features of the broad spectrum are captured by the simulation assuming a single (isolated)  $S=3/2$  spin system, there are a number of features that are not. These include:

- Low field signal 22 mT ( $g = 30$ )
- Additional peak at 200 mT ( $g = 3.35$ )
- High field signal at 770 mT ( $g = 0.87$ )

All these features have exactly the same, near-curie temperature dependence as those of the more intense turning points characteristic of an isolated rhombic  $S=3/2$  spin system, indicating that they all arise from the same spin system. These additional features are taken as evidence that the spectrum should be assign to a magnetically coupled  $S=3/2$  dimer.

**2.3)  $S_1=3/2$ ,  $S_2=3/2$  exchange coupled spin state ladder.** The temperature dependence of the EPR signals allows an estimate of the magnitude and sign of the magnetic exchange coupling ( $J$ ) to be made. As shown in the main text, the temperature dependence is near-curie (linear), with the small

drop in EPR intensity at low temperatures. The small drop in EPR intensity at low temperatures, must arise from populating the EPR silent states (e.g. an effective  $S = 0$  state). This requires the ground state to have the lowest total effective spin and that the coupling between the two Mn ions to be antiferromagnetic. The near-linear temperature dependence of all EPR turning points indicates that all effective spin states of the manifold, including higher effective spin state ( $S = 2, S = 3$ ), are populated at all temperatures assayed, suggesting the magnitude of  $J$  is estimated to be only  $0.5 \text{ cm}^{-1}$  i.e. of the same order of magnitude as that of the site ZFS of each Mn ion.

As a consequence, the Mn dimer is best described as being in the intermediate exchange limit ( $|J| \approx |d|$ ). This result is expected. **4** has no direct through bond (super-exchange) pathway between the two Mn ions, and as such, the interaction between the two Mn ions is expected to be small;  $\text{Mn}^{\text{II}}$  dimers with no direct through bond linkage have exchange coupling of  $1 \text{ cm}^{-1}$ .<sup>9</sup> In addition, unlike high spin  $\text{Mn}^{\text{II}}$ , high spin  $\text{Mn}^0$  is expected to displaying large site ZFS ( $\text{cm}^{-1}$ ), as seen in the recently characterized  $\text{Mn}^0$  complex.<sup>12</sup> Note that the ZFS of a transition metal ion has two contributions which arise from the spin-orbit coupling (SOC), spin-spin (SS) coupling of its set of d-electrons. Of these, the SOC dominates. A high spin  $\text{Mn}^0$  has an orbitally degenerate ground electronic state ( $^4F$ ) in the absence of crystal field splitting, and as such, low lying electronic excited state, leading to a large SOC contributing to its ZFS ( $d$ ). In contrast, a  $\text{Mn}^{\text{II}}$  ion has an orbitally non-degenerate ground state ( $^6S$ ) and thus non SOC contribution, with its ZFS coming about from only the SS term.

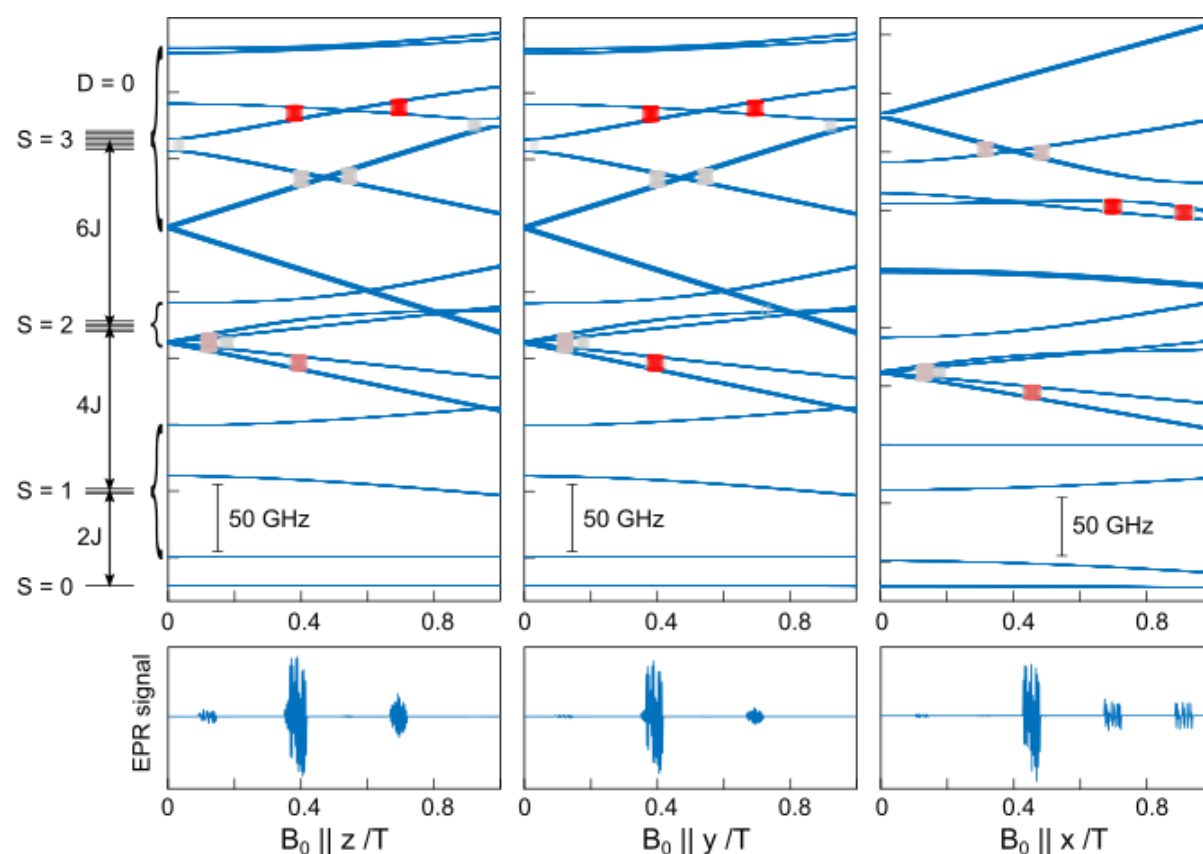

**Figure S18. Top)** Energy level diagrams for the  $\text{Mn}^0\text{Mn}^0$  dimer complex simulation shown in the main text. Simulation parameters:  $S_1 = 3/2$ ;  $S_2 = 3/2$ ;  $J = 0.85$ ;  $d_1 = d_2 = -1.12 \text{ cm}^{-1}$ ;  $e_1/d_1 = e_2/d_2 = 0.26$ ;  $g_1 = g_2 = 1.92$ . The three panels correspond to the  $B_0$  field aligned along the three principal axes of the complex defined by the D-tensor:  $D_z$ ,  $D_y$  and  $D_x$ . The red and grey vertical lines represent allowed transitions. The energy-level ladder on the left-hand side shows the energy-levels at zero-field in the absence of any ZFS. **Bottom)** Corresponding predicted single crystal EPR spectra at X-band.

Thus, describing the spin system in terms of effective spin state is strictly incorrect. That said, it is still useful to use this nomenclature, as it provides an explanation for how the two EPR signal observed come about. The exchange coupled spin state ladder of an  $S_1=3/2$ ,  $S_2=3/2$  is shown in Figure S18, solved along the three canonical axes. The lowest energy level is the effective  $S = 0$  ground state, which has no magnetic field dependence. The next three levels derive from the effective  $S = 1$  state, which has a large ZFS, as expected from the spin projection factors listed in Table S2. As such there is no EPR transitions between these levels as the resonance condition is not met.

It is instead the  $S=2$ , and to a lesser extent the  $S=3$ , effective spin states that describe the EPR signals observed. The  $S=2$  effective spin state has a ZFS is small, which leads to transitions within this sub-manifold appearing at  $g = 2$ . Furthermore, along two axes, the same transition appears at the same resonance field(s), suggesting there are EPR transitions present that are intrinsically narrow. These would potentially allow  $^{55}\text{Mn}$  hyperfine structure to be resolved, as seen earlier for  $\text{Mn}^{\text{II}}$  dimers (see Figure S18 and Figure S19, panel D) which shows an enlargement of the  $g = 2$  region).

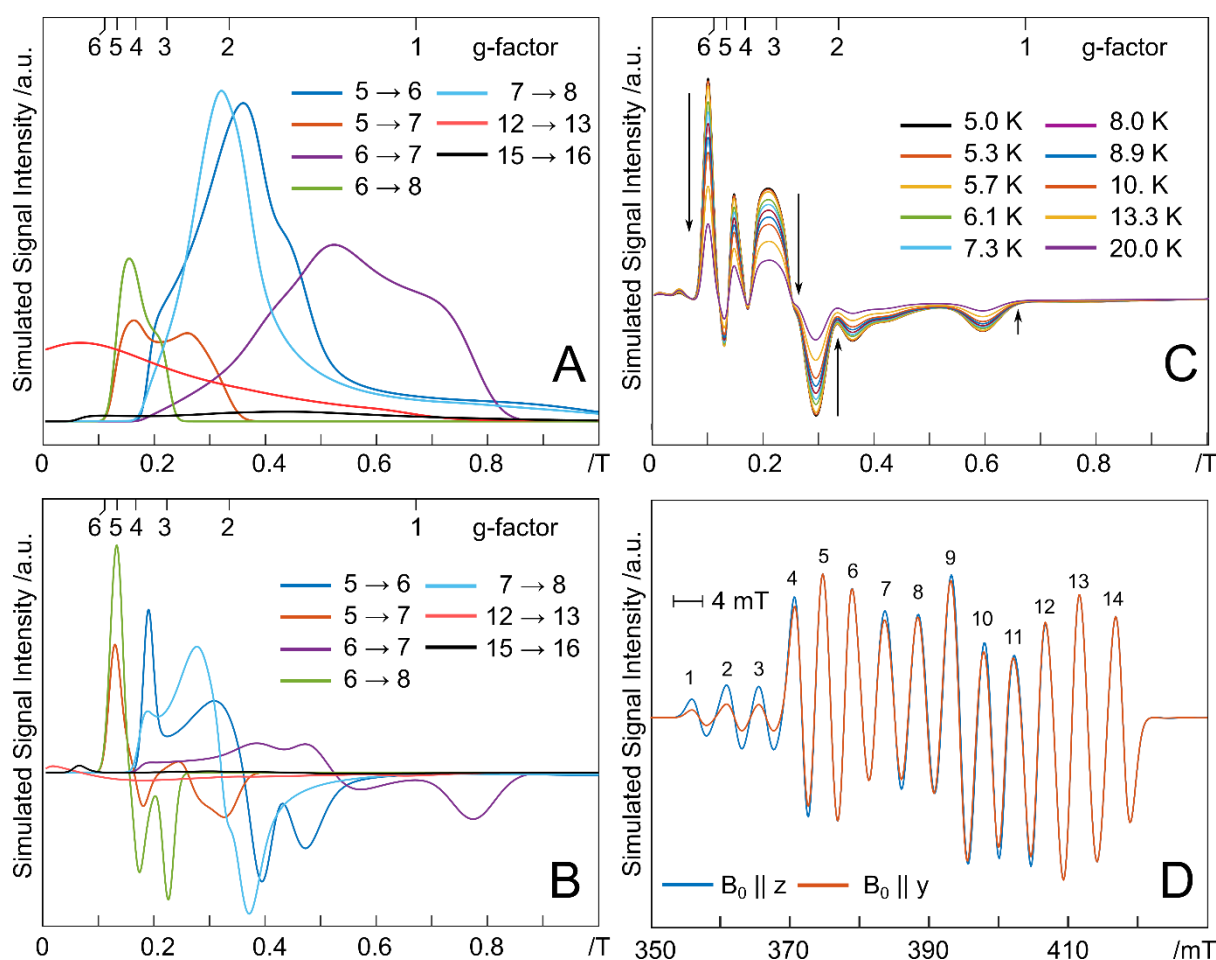

**Figure S19.** Decomposition of the  $\text{Mn}^0\text{Mn}^0$  dimer complex simulation shown in the main text. Simulation parameters:  $S_1 = 3/2$ ;  $S_2 = 3/2$ ;  $J = 0.85$ ;  $d_1 = d_2 = -1.12 \text{ cm}^{-1}$ ;  $e_1/d_1 = e_2/d_2 = 0.26$ ;  $g_1 = g_2 = 1.92$ . An isotropic linewidth of 20 mT was used. To capture linebroadening at higher magnetic fields, D strain was included i.e.  $d_{\text{strain}} = 0.24 \text{ cm}^{-1}$ ,  $e_{\text{strain}} = 0.168 \text{ cm}^{-1}$ . **A)** Intense EPR transitions which make up the EPR spectrum. The energy levels 5 through 9 are derived from the effective  $S=2$  spin sub-manifold. The energy levels 10 through 16 are derived from the effective  $S=3$  spin sub-manifold. **B)** Corresponding first derivative of the EPR transitions shown in panel A. **C)** Calculated temperature dependence of the EPR signal over the 5-20 K temperature range. **D)** Calculated 14-line multiline spectrum assuming  $B_0$  is aligned along the along the z and y principal axes of the complex defined by the D-tensor:  $D_z$ ,  $D_y$  and  $D_x$ .

The same spin sub-manifold ( $S = 2$ ) also resolves transitions at low and high field, with these tuning points being dependent on the interplay of  $J$  and  $D$  i.e. the extent to which the  $S=2$  submanifold mixes with  $S = 1$  and  $S = 3$  – or equally the extent to which the strong exchange limit breaks down.

The same observations can be made from decomposing the  $Mn^0$  dimer simulation shown in the main text (Figure S19, panels A and B). In this simulation two identical interacting  $S=3/2$  spin are assumed. This simulation reproduces all features seen in the experimental spectrum and its temperature dependence. All the intense transitions derive from the  $S=2$  submanifold (energy-levels, 5 through 9), which goes to why the temperature dependence of all turning points are the same. Two transitions give rise to an axial signal whose main intensity is centred at  $g=2$ : the  $5 \rightarrow 6$  and  $7 \rightarrow 8$ . The superposition of both likely give rise to the  $>11$  peak multiline pattern observed.

As the shape of individual EPR transitions are dependent on the interplay of  $J$  and the fine structure parameters ( $d_1, d_2, e_1, e_2$ ), we suspect the fitted values are correlated. That said, the reproduction of the temperature dependence (see Figure 5 main text and Figure S19, panel C), including the small deviation seen between the high and low field edges, suggests that the magnitude of both  $J$  and fine structure parameters ( $d_1, d_2$ ) is well constrained, with both being approximately  $1 \text{ cm}^{-1}$  and the  $d$  must be negative.

We note that the ZFS is substantially smaller than for the for recently reported high spin, low coordinate  $Mn^0$  complex ( $1 \text{ cm}^{-1}$  vs.  $3.1 \text{ cm}^{-1}$ ). In this previous study it was suggested that its oxidation state, while formally  $Mn^0$ , also had some  $Mn^{II}$  and  $Mn^{IV}$  character i.e. suggesting the ligand is partially reduced. We hypothesize that a decrease in magnitude of the ZFS seen for the  $Mn^0$  site(s) of our complex reflects an increase in its  $Mn^{II}$  and  $Mn^{IV}$  character/more reduced ligand character – however we stress we can't quantify this increase. Note too that while each spin fragment of the dimer may have ligand character, the total spin of the spin fragment is well defined ( $S = 3/2$ ).

**2.4) Collapse of both the multiline and broad EPR signal at higher temperatures:** It was seen that both the multiline and broad EPR signal were progressively lost at higher temperatures with the concomitant increase of a broad unstructured signal centred at  $g=2$ . This behaviour had not previously been seen for  $Mn^{II}Mn^{II}$  dimers. We suspect that this is an example of exchange narrowing. Exchange narrowing can occur when the interaction between the two spin fragments is of the order of  $kT$ . Exchange narrowed spectra are characterized by a Lorentzian lineshape, is consistent with the signal observed.<sup>13</sup> Temperature induced exchange narrowing further supports the assignment of the two EPR signals to that of a weakly coupled dimer.

**2.5) Inability to reproduce both EPR signals in a single simulation.** In principle, the entire EPR lineshape (multiline + broad signal) should be reproduced by a single spin Hamiltonian simulation. We were not able to achieve this. This is because the apparent linewidth of the multiline signal and the broad signal are vastly different. It has previously been observed in  $Mn^{II}$  complexes that different spin sub-manifolds display different line broadening mechanisms. The linewidth of broader components of a  $Mn^{II}$  dimer signal are due to inhomogeneity of the ZFS tensor ( $D$ ), which is composed of the site ZFS tensors ( $d_a$  and  $d_b$ ). In contrast, the linewidth of the  $S = 3$  spin submanifold of  $Mn^{II}$  dimer signal is instead due to inhomogeneity of the  $d_{ab}$  tensor (i.e. small variations in the Mn-Mn distance). We suspect the same is the case here, for the  $Mn^0$  dimer.



## Computational data

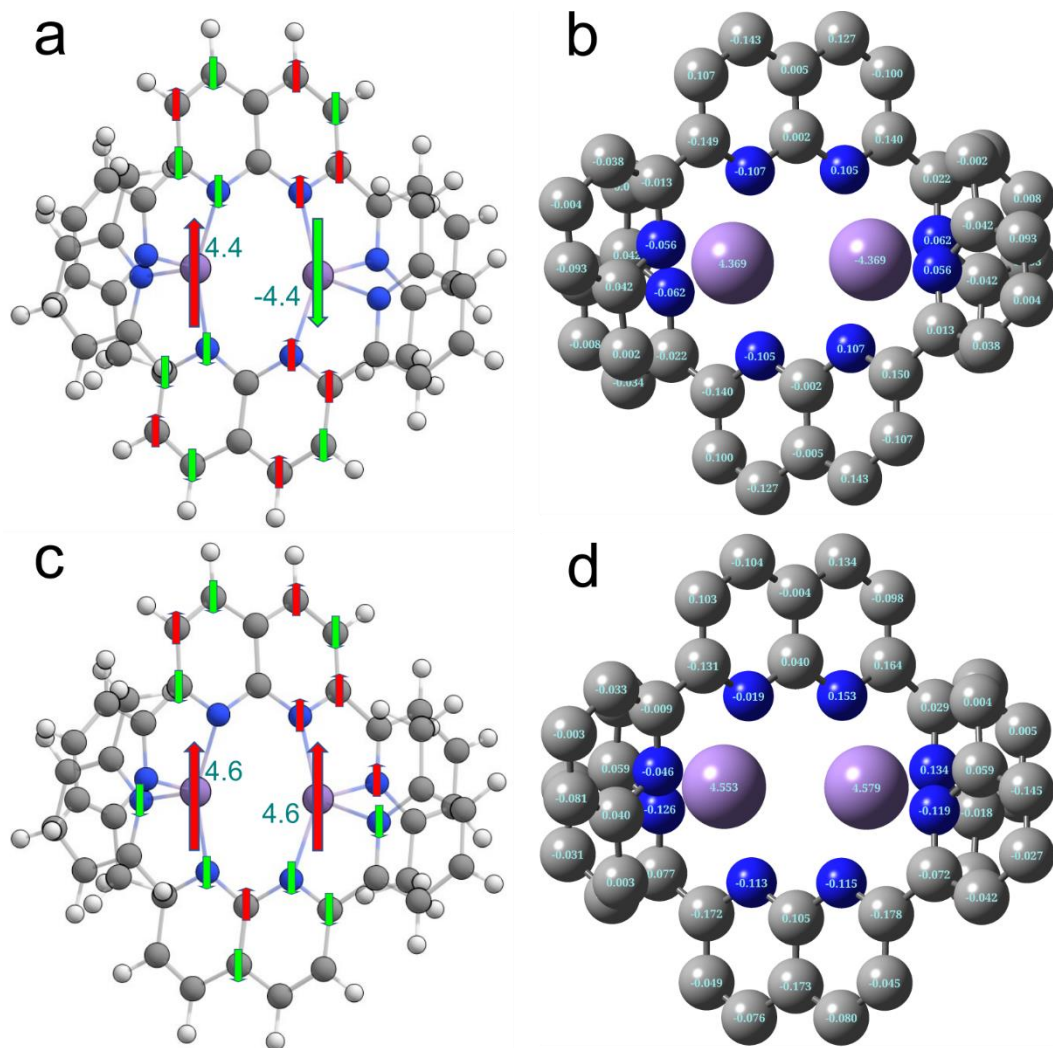

**Figure S20.** (a, c) Formal spin densities inducing local magnetic moments with their directions on Mn atoms, and the non-metallic atoms that have a significant contribution to the total magnetic moment of the open-shell singlet and nonet high spin states of **4**. (b, d) Formal spin density values of individual atoms in the open-shell singlet and nonet high spin states of **4**.

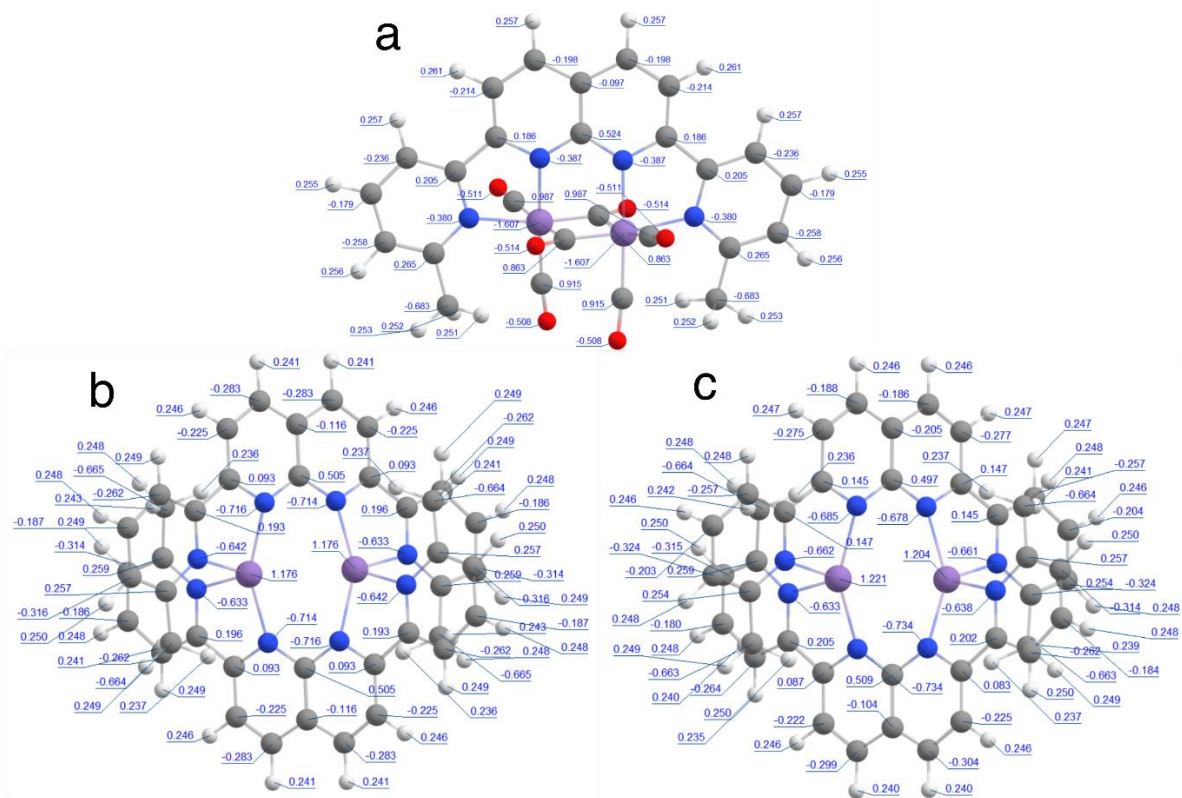

**Figure S21.** Charge of individual atoms obtained from NBO analysis of the singlet state of **2** (a), of the broken-symmetry singlet state of **4** (b), and the nonet state of **4** (c).

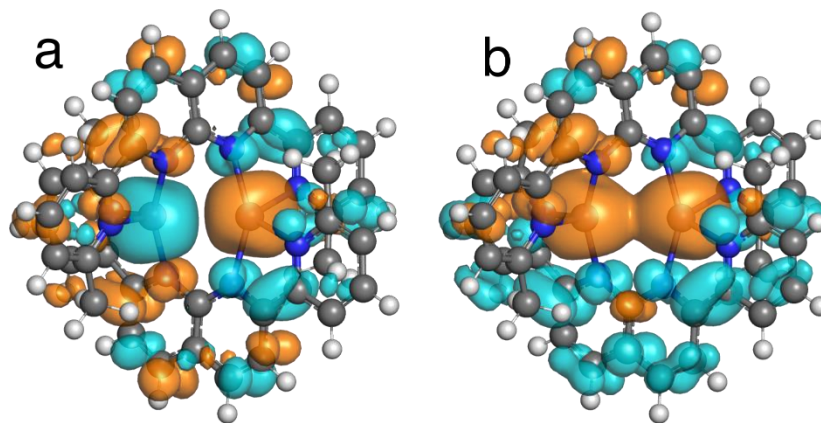

**Figure S22.** Spin densities of the open-shell singlet (a) and nonet (b) states of **4**.

**Table S3.** Relative Gibbs free energies (G, 298.15 K, THF) of the various spin states of **2** and **4**, and their calculated bond lengths, bond critical bond densities ( $\rho_{cp}$ ), Laplacian of the electron density ( $\nabla^2\rho_{cp}$ ), total energy density ( $H_{cp}$ ) and metal-metal decomposed energy components of interactions between Mn and Mn.<sup>a</sup>

| Species              | Unpaired electrons | Relative G (kJ/mol) | M...M distance (Å) | BCP density $\rho_{cp}$ (a.u.) | Laplacian $\nabla^2\rho_{cp}$ (a.u.) | Total energy density $H_{cp}$ (a.u.) | $E_{covalent}$ (kcal/mol) |
|----------------------|--------------------|---------------------|--------------------|--------------------------------|--------------------------------------|--------------------------------------|---------------------------|
| <b>2</b> -singlet    | 0                  | 0                   | 2.82               | 0.029                          | 0.078                                | -0.001                               | -12.80                    |
| <b>2</b> -triplet    | 2                  | 91.8                | 2.71               | 0.000                          | 0.000                                | 0.000                                | -                         |
| <b>2</b> -quintet    | 4                  | 221.0               | 2.48               | 0.056                          | 0.110                                | -0.014                               | -35.78                    |
| <b>2</b> -septet     | 6                  | 287.4               | 3.44               | 0.000                          | 0.000                                | 0.000                                | -                         |
| <b>2</b> -nonet      | 8                  | 228.2               | 3.41               | 0.000                          | 0.000                                | 0.000                                | -                         |
| <b>4</b> -singlet    | 0                  | 443.0               | 2.91               | 0.023                          | 0.030                                | -0.003                               | -29.05                    |
| <b>4</b> -singlet-BS | 0                  | 0                   | 2.92               | 0.015                          | 0.029                                | -0.003                               | -                         |
| <b>4</b> -triplet    | 2                  | 463.6               | 2.89               | 0.022                          | 0.034                                | -0.002                               | -                         |
| <b>4</b> -quintet    | 4                  | 352.8               | 2.85               | 0.020                          | 0.033                                | -0.002                               | -14.14                    |
| <b>4</b> -septet     | 6                  | 185.4               | 2.91               | 0.019                          | 0.027                                | -0.002                               | -16.09                    |
| <b>4</b> -nonet      | 8                  | 41.6                | 2.97               | 0.012                          | 0.030                                | 0.006                                | -6.34                     |
| <b>4</b> -11et       | 10                 | 70.8                | 2.98               | 0.013                          | 0.028                                | 0.004                                | -6.09                     |

<sup>a</sup> Based on QTAIM calculations at the M062X/TZP//wB97XD/6-31G(d) level of theory unless noted otherwise.

<sup>b</sup> Calculated with the wB97XD functional in conjunction with Def2TZVPD basis set for Mn and Def2SVPD for all non-metal atoms using wB97XD/6-31G(d) geometries, and SMD to model the THF solvent environment. BS indicates the spin broken symmetry state.

**Table S4.** Energy components (Hartree, 298.15 K) used to calculate Gibbs free energies of all species in Table S3.

| Species              | $E^b$       | E           | ZPE     | TC      | TS      | H           | G           |
|----------------------|-------------|-------------|---------|---------|---------|-------------|-------------|
| <b>2</b> -singlet    | -3971.29828 | -3972.19889 | 0.38012 | 0.03192 | 0.09691 | -3970.88436 | -3970.97823 |
| <b>2</b> -triplet    | -3971.25960 | -3972.15855 | 0.37832 | 0.03266 | 0.09955 | -3970.84673 | -3970.94325 |
| <b>2</b> -quintet    | -3971.20822 | -3972.10615 | 0.37618 | 0.03323 | 0.10018 | -3970.79692 | -3970.89406 |
| <b>2</b> -septet     | -3971.17756 | -3972.07946 | 0.37304 | 0.03410 | 0.10327 | -3970.76853 | -3970.86877 |
| <b>2</b> -nonet      | -3971.18670 | -3972.08410 | 0.36611 | 0.03763 | 0.11327 | -3970.78107 | -3970.89131 |
| <b>4</b> -singlet    | -4281.80303 | -4282.87952 | 0.64371 | 0.03987 | 0.11258 | -4281.11757 | -4281.22712 |
| <b>4</b> -singlet-BS | -4281.95784 | -4283.04201 | 0.64028 | 0.04219 | 0.11682 | -4281.27443 | -4281.38822 |
| <b>4</b> -triplet    | -4281.78540 | -4282.88119 | 0.64313 | 0.04113 | 0.11476 | -4281.10019 | -4281.21194 |
| <b>4</b> -quintet    | -4281.82616 | -4282.90541 | 0.64268 | 0.04031 | 0.11559 | -4281.14128 | -4281.25384 |
| <b>4</b> -septet     | -4281.88891 | -4282.97177 | 0.64175 | 0.04162 | 0.11606 | -4281.20460 | -4281.31764 |
| <b>4</b> -nonet      | -4281.93979 | -4283.02391 | 0.64047 | 0.04129 | 0.11926 | -4281.25614 | -4281.37237 |
| <b>4</b> -11et       | -4281.92792 | -4283.01026 | 0.63926 | 0.04140 | 0.11892 | -4281.24538 | -4281.36126 |

<sup>a</sup> Unless stated otherwise, calculations were performed at the wB97XD/6-31G(d) level of theory using SMD to simulate the effects of THF. E is the total DFT energy, ZPE is the zero-point vibrational energy, TC is the thermal correction to the enthalpy, H is the total enthalpy, TS is the temperature times the total entropy, and G is the total Gibbs free energy in solution and includes a correction for change of state from 1 atm to 1 M. <sup>b</sup> Calculated with the wB97XD functional in conjunction with Def2TZVPD for Mn and Def2SVPD for all non-metal atoms based on the wB97XD/6-31G(d) optimal geometry using SMD to model the THF solvent environment. BS indicates the spin broken symmetry state.

**Table S5.** Charge values of Mn atoms and ligands of a singlet state of **2**, and the broken-symmetry singlet and nonet states of **4**.

| Species      | Mn   | Mn   | Ligand | Ligand           |
|--------------|------|------|--------|------------------|
| 2-singlet    | -1.6 | -1.6 | 0.8    | 2.4 <sup>a</sup> |
| 4-singlet-BS | 1.2  | 1.2  | -1.2   | -1.2             |
| 4-nonet      | 1.2  | 1.2  | -1.2   | -1.2             |

<sup>a</sup>Total charge value of all CO ligands.

## XYZ coordinates

Mn2L(CO)6-singlet.xyz

|    |               |               |               |
|----|---------------|---------------|---------------|
| Mn | 8.2491790000  | 2.8436220000  | 10.0290420000 |
| O  | 7.9974670000  | 2.9626750000  | 12.9687800000 |
| N  | 7.7391000000  | 4.7367900000  | 9.6328720000  |
| N  | 8.8235490000  | 3.0991080000  | 8.0201360000  |
| O  | 11.0592800000 | 3.2342550000  | 10.7745220000 |
| O  | 8.5189300000  | -0.0469260000 | 10.6063550000 |
| C  | 6.8895630000  | 5.4539070000  | 10.4047370000 |
| C  | 8.9913650000  | 4.4146140000  | 7.6905340000  |
| C  | 8.3566700000  | 5.3502880000  | 8.6010800000  |
| C  | 9.6703420000  | 4.8199150000  | 6.5358130000  |
| H  | 9.8155530000  | 5.8740110000  | 6.3280780000  |
| C  | 6.8895630000  | 6.8704040000  | 10.4047580000 |
| C  | 7.6407660000  | 7.5111080000  | 9.3906610000  |
| H  | 7.6438400000  | 8.5954820000  | 9.3295260000  |
| C  | 9.2486420000  | 2.1629600000  | 7.1340780000  |
| C  | 7.8996620000  | 2.9139080000  | 11.8081730000 |
| C  | 8.3148720000  | 6.7504210000  | 8.4625890000  |
| H  | 8.8316370000  | 7.2335540000  | 7.6408570000  |
| C  | 10.1324320000 | 3.8595190000  | 5.6596800000  |
| H  | 10.6548570000 | 4.1423470000  | 4.7507200000  |
| C  | 9.8902660000  | 2.5187740000  | 5.9534300000  |
| H  | 10.1995280000 | 1.7382350000  | 5.2657600000  |
| C  | 9.9580380000  | 3.0884860000  | 10.4481660000 |
| C  | 9.0090130000  | 0.7141640000  | 7.4301550000  |
| H  | 9.7144770000  | 0.3473320000  | 8.1831040000  |
| H  | 9.1513330000  | 0.1172630000  | 6.5252940000  |
| H  | 7.9918440000  | 0.5501580000  | 7.7975760000  |
| C  | 8.3998950000  | 1.0610560000  | 10.2901440000 |
| N  | 6.0400300000  | 4.7367490000  | 11.1765840000 |
| N  | 4.9553720000  | 3.0990190000  | 12.7893080000 |
| C  | 4.7877300000  | 4.4145610000  | 13.1189120000 |
| C  | 5.4224760000  | 5.3502230000  | 12.2083970000 |
| C  | 4.1088040000  | 4.8200050000  | 14.2736140000 |
| H  | 3.9637420000  | 5.8741300000  | 14.4813030000 |
| C  | 6.1383660000  | 7.5110760000  | 11.4188750000 |
| H  | 6.1352820000  | 8.5954480000  | 11.4800430000 |
| C  | 4.5300040000  | 2.1629700000  | 13.6753780000 |
| C  | 5.4642720000  | 6.7503500000  | 12.3469260000 |
| H  | 4.9475200000  | 7.2334560000  | 13.1686820000 |
| C  | 3.6465710000  | 3.8597270000  | 15.1497810000 |
| H  | 3.1242180000  | 4.1426650000  | 16.0587480000 |
| C  | 3.8884720000  | 2.5189430000  | 14.8560290000 |
| H  | 3.5790290000  | 1.7384730000  | 15.5436930000 |
| C  | 4.7691870000  | 0.7140850000  | 13.3794710000 |
| H  | 4.0640740000  | 0.3475880000  | 12.6260400000 |
| H  | 4.6259320000  | 0.1172600000  | 14.2842360000 |
| H  | 5.7865530000  | 0.5495750000  | 13.0128160000 |
| Mn | 5.5301290000  | 2.8435870000  | 10.7803540000 |
| O  | 5.7815360000  | 2.9628820000  | 7.8405940000  |
| O  | 2.7199820000  | 3.2340060000  | 10.0349250000 |

|   |              |               |               |
|---|--------------|---------------|---------------|
| O | 5.2638100000 | -0.0469960000 | 10.2019180000 |
| C | 5.8794010000 | 2.9140170000  | 9.0011880000  |
| C | 3.8211550000 | 3.0879300000  | 10.3613660000 |
| C | 5.3800670000 | 1.0609790000  | 10.5191910000 |

Mn2L(CO)6-triplet.xyz

|    |               |               |               |
|----|---------------|---------------|---------------|
| Mn | 8.1717280000  | 2.7700910000  | 9.9640120000  |
| O  | 7.9883720000  | 2.7494970000  | 12.9132390000 |
| N  | 7.7102630000  | 4.7306880000  | 9.6131780000  |
| N  | 8.8221270000  | 3.0904630000  | 7.9669090000  |
| O  | 10.9731260000 | 3.2574090000  | 10.7669000000 |
| O  | 8.5729500000  | -0.1262570000 | 10.4290970000 |
| C  | 6.8895540000  | 5.4488280000  | 10.4047300000 |
| C  | 9.0423540000  | 4.4247890000  | 7.7233680000  |
| C  | 8.4147990000  | 5.3385330000  | 8.6478030000  |
| C  | 9.7599510000  | 4.8600310000  | 6.5989640000  |
| H  | 9.9519850000  | 5.9156320000  | 6.4464530000  |
| C  | 6.8895440000  | 6.8777710000  | 10.4047230000 |
| C  | 7.7089320000  | 7.5161250000  | 9.4366090000  |
| H  | 7.7356970000  | 8.6029010000  | 9.4006120000  |
| C  | 9.2213440000  | 2.1924960000  | 7.0444230000  |
| C  | 7.8332450000  | 2.7654390000  | 11.7590270000 |
| C  | 8.4391620000  | 6.7800990000  | 8.5474070000  |
| H  | 9.0437820000  | 7.2658960000  | 7.7915680000  |
| C  | 10.2011490000 | 3.9273170000  | 5.6811970000  |
| H  | 10.7533020000 | 4.2397820000  | 4.7997130000  |
| C  | 9.9034560000  | 2.5819970000  | 5.8911330000  |
| H  | 10.1985230000 | 1.8274770000  | 5.1697100000  |
| C  | 9.8851530000  | 3.0738790000  | 10.4347260000 |
| C  | 8.9183290000  | 0.7388190000  | 7.2553040000  |
| H  | 9.6256100000  | 0.2915100000  | 7.9614860000  |
| H  | 9.0097820000  | 0.1952500000  | 6.3112350000  |
| H  | 7.9039320000  | 0.5960960000  | 7.6371190000  |
| C  | 8.4089770000  | 0.9858790000  | 10.1624970000 |
| N  | 6.0688550000  | 4.7306890000  | 11.1962900000 |
| N  | 4.9569890000  | 3.0904640000  | 12.8425500000 |
| C  | 4.7367460000  | 4.4247860000  | 13.0860910000 |
| C  | 5.3643030000  | 5.3385320000  | 12.1616550000 |
| C  | 4.0191330000  | 4.8600090000  | 14.2104920000 |
| H  | 3.8270810000  | 5.9156050000  | 14.3630140000 |
| C  | 6.0701430000  | 7.5161240000  | 11.3728280000 |
| H  | 6.0433630000  | 8.6029010000  | 11.4088120000 |
| C  | 4.5577820000  | 2.1924840000  | 13.7650220000 |
| C  | 5.3399210000  | 6.7800990000  | 12.2620370000 |
| H  | 4.7352920000  | 7.2658990000  | 13.0178670000 |
| C  | 3.5779310000  | 3.9272790000  | 15.1282440000 |
| H  | 3.0257610000  | 4.2397300000  | 16.0097220000 |
| C  | 3.8756430000  | 2.5819630000  | 14.9183040000 |
| H  | 3.5805750000  | 1.8274330000  | 15.6397160000 |
| C  | 4.8608340000  | 0.7388180000  | 13.5541130000 |
| H  | 4.1535250000  | 0.2914870000  | 12.8479710000 |
| H  | 4.7694610000  | 0.1952400000  | 14.4981850000 |
| H  | 5.8752100000  | 0.5961310000  | 13.1722290000 |
| Mn | 5.6073450000  | 2.7700870000  | 10.8454530000 |
| O  | 5.7907200000  | 2.7494240000  | 7.8962260000  |
| O  | 2.8059810000  | 3.2574540000  | 10.0424960000 |
| O  | 5.2058880000  | -0.1262460000 | 10.3804400000 |
| C  | 5.9458740000  | 2.7654020000  | 9.0504360000  |
| C  | 3.8939630000  | 3.0740120000  | 10.3746860000 |
| C  | 5.3699270000  | 0.9858980000  | 10.6469690000 |

Mn2L(CO)6-quintet.xyz

|    |              |              |               |
|----|--------------|--------------|---------------|
| Mn | 8.0017970000 | 2.7669630000 | 9.8853790000  |
| O  | 8.0212330000 | 2.5708100000 | 12.8587380000 |

|    |               |               |               |
|----|---------------|---------------|---------------|
| N  | 7.7156310000  | 4.7310600000  | 9.6240240000  |
| N  | 8.7970650000  | 3.0973400000  | 7.9484540000  |
| O  | 10.7703460000 | 3.3785900000  | 10.8918450000 |
| O  | 8.5314850000  | -0.1597800000 | 10.2522740000 |
| C  | 6.8895260000  | 5.4509380000  | 10.4047230000 |
| C  | 9.0802720000  | 4.4449610000  | 7.7476790000  |
| C  | 8.4817110000  | 5.3427400000  | 8.6636920000  |
| C  | 9.8578750000  | 4.8632090000  | 6.6393500000  |
| H  | 10.1098870000 | 5.9116960000  | 6.5280970000  |
| C  | 6.8895270000  | 6.8641620000  | 10.4047280000 |
| C  | 7.7678320000  | 7.5047240000  | 9.4832010000  |
| H  | 7.8036900000  | 8.5908950000  | 9.4592710000  |
| C  | 9.1549080000  | 2.2146500000  | 6.9867750000  |
| C  | 7.6179200000  | 2.6403010000  | 11.7659390000 |
| C  | 8.5330010000  | 6.7730800000  | 8.6208450000  |
| H  | 9.1705060000  | 7.2687280000  | 7.8981810000  |
| C  | 10.2619070000 | 3.9428790000  | 5.7105850000  |
| H  | 10.8531680000 | 4.2479010000  | 4.8523560000  |
| C  | 9.8751560000  | 2.5994810000  | 5.8655520000  |
| H  | 10.1396760000 | 1.8550440000  | 5.1233350000  |
| C  | 9.7273210000  | 3.1284770000  | 10.5026860000 |
| C  | 8.7685360000  | 0.7694410000  | 7.1276360000  |
| H  | 9.4375320000  | 0.2462580000  | 7.8184070000  |
| H  | 8.8487450000  | 0.2669150000  | 6.1605550000  |
| H  | 7.7391500000  | 0.6566070000  | 7.4787380000  |
| C  | 8.3340660000  | 0.9445460000  | 10.0169530000 |
| N  | 6.0634210000  | 4.7310530000  | 11.1854180000 |
| N  | 4.9819940000  | 3.0973230000  | 12.8609840000 |
| C  | 4.6987930000  | 4.4449430000  | 13.0617700000 |
| C  | 5.2973480000  | 5.3427260000  | 12.1457580000 |
| C  | 3.9212090000  | 4.8631880000  | 14.1701120000 |
| H  | 3.6692020000  | 5.9116760000  | 14.2813720000 |
| C  | 6.0112250000  | 7.5047170000  | 11.3262620000 |
| H  | 5.9753660000  | 8.5908870000  | 11.3502010000 |
| C  | 4.6241770000  | 2.2146320000  | 13.8226740000 |
| C  | 5.2460590000  | 6.7730660000  | 12.1886160000 |
| H  | 4.6085600000  | 7.2687090000  | 12.9112870000 |
| C  | 3.5171990000  | 3.9428590000  | 15.0988870000 |
| H  | 2.9259610000  | 4.2478810000  | 15.9571310000 |
| C  | 3.9039580000  | 2.5994640000  | 14.9439160000 |
| H  | 3.6394690000  | 1.8550280000  | 15.6861450000 |
| C  | 5.0105810000  | 0.7694300000  | 13.6818380000 |
| H  | 4.3415890000  | 0.2462200000  | 12.9910850000 |
| H  | 4.9303940000  | 0.2669230000  | 14.6489290000 |
| H  | 6.0399670000  | 0.6566120000  | 13.3307290000 |
| Mn | 5.7772620000  | 2.7669310000  | 10.9240350000 |
| O  | 5.7578540000  | 2.5708640000  | 7.9506670000  |
| O  | 3.0088270000  | 3.3787980000  | 9.9174520000  |
| O  | 5.2475710000  | -0.1598000000 | 10.5570990000 |
| C  | 6.1611350000  | 2.6403240000  | 9.0434840000  |
| C  | 4.0517870000  | 3.1285450000  | 10.3066970000 |
| C  | 5.4449960000  | 0.9445250000  | 10.7924430000 |

Mn2L(CO)6-septet.xyz

|    |               |               |               |
|----|---------------|---------------|---------------|
| Mn | 8.2246740000  | 2.7036270000  | 9.7252610000  |
| O  | 8.0135830000  | 2.3922010000  | 12.6997820000 |
| N  | 7.7035470000  | 4.6580760000  | 9.5773900000  |
| N  | 8.9461600000  | 3.1084550000  | 7.8389520000  |
| O  | 11.1197690000 | 3.2382260000  | 10.5830350000 |
| O  | 8.7323770000  | -0.1712530000 | 10.2554110000 |
| C  | 6.8883780000  | 5.3583270000  | 10.4044870000 |
| C  | 9.0403370000  | 4.4777870000  | 7.6304130000  |
| C  | 8.4096660000  | 5.3124440000  | 8.5872450000  |
| C  | 9.7030770000  | 4.9766670000  | 6.4774590000  |
| H  | 9.7984640000  | 6.0452000000  | 6.3280180000  |

|    |               |               |               |
|----|---------------|---------------|---------------|
| C  | 6.8874570000  | 6.7781730000  | 10.4043190000 |
| C  | 7.7040680000  | 7.4473620000  | 9.4526990000  |
| H  | 7.7209510000  | 8.5342880000  | 9.4499890000  |
| C  | 9.4088620000  | 2.2599170000  | 6.8862480000  |
| C  | 7.5150200000  | 2.4763770000  | 11.6382460000 |
| C  | 8.4331110000  | 6.7413240000  | 8.5467550000  |
| H  | 9.0357320000  | 7.2557210000  | 7.8086420000  |
| C  | 10.1904170000 | 4.1051080000  | 5.5438610000  |
| H  | 10.6888350000 | 4.4770600000  | 4.6536620000  |
| C  | 10.0214090000 | 2.7186410000  | 5.7350950000  |
| H  | 10.3739910000 | 2.0073650000  | 4.9970910000  |
| C  | 10.0331480000 | 3.0534180000  | 10.3001800000 |
| C  | 9.2568670000  | 0.7807210000  | 7.0970770000  |
| H  | 9.9451480000  | 0.4216590000  | 7.8698070000  |
| H  | 9.4911600000  | 0.2432350000  | 6.1749580000  |
| H  | 8.2358380000  | 0.5181470000  | 7.3907230000  |
| C  | 8.5616540000  | 0.9321270000  | 9.9770480000  |
| N  | 6.0740920000  | 4.6572600000  | 11.2317680000 |
| N  | 4.8337130000  | 3.1064320000  | 12.9705750000 |
| C  | 4.7377170000  | 4.4756800000  | 13.1788620000 |
| C  | 5.3672170000  | 5.3109620000  | 12.2218160000 |
| C  | 4.0744030000  | 4.9738980000  | 14.3317660000 |
| H  | 3.9774860000  | 6.0423390000  | 14.4809050000 |
| C  | 6.0699830000  | 7.4465500000  | 11.3557740000 |
| H  | 6.0516820000  | 8.5334540000  | 11.3581820000 |
| C  | 4.3724610000  | 2.2574490000  | 13.9235840000 |
| C  | 5.3418980000  | 6.7398120000  | 12.2619490000 |
| H  | 4.7386320000  | 7.2536030000  | 12.9999610000 |
| C  | 3.5884740000  | 4.1018550000  | 15.2656500000 |
| H  | 3.0896380000  | 4.4732940000  | 16.1558300000 |
| C  | 3.7595040000  | 2.7155830000  | 15.0747540000 |
| H  | 3.4081400000  | 2.0039920000  | 15.8130330000 |
| C  | 4.5266160000  | 0.7784250000  | 13.7130950000 |
| H  | 3.8386290000  | 0.4181280000  | 12.9406840000 |
| H  | 4.2934360000  | 0.2408360000  | 14.6354350000 |
| H  | 5.5479350000  | 0.5173170000  | 13.4191530000 |
| Mn | 5.5549970000  | 2.7023300000  | 11.0840770000 |
| O  | 5.7666570000  | 2.3907340000  | 8.1094290000  |
| O  | 2.6589870000  | 3.2351970000  | 10.2278100000 |
| O  | 5.0492780000  | -0.1727490000 | 10.5537960000 |
| C  | 6.2648210000  | 2.4756450000  | 9.1710970000  |
| C  | 3.7458850000  | 3.0509980000  | 10.5099310000 |
| C  | 5.2193920000  | 0.9307180000  | 10.8322220000 |

Mn2L(CO)6--nonet.xyz

|    |               |               |               |
|----|---------------|---------------|---------------|
| Mn | 8.0307630000  | 2.6316040000  | 9.7184870000  |
| O  | 8.4843750000  | 2.5159070000  | 12.8598340000 |
| N  | 7.3542950000  | 4.5843520000  | 9.2855420000  |
| N  | 9.1243720000  | 3.0854770000  | 7.9423610000  |
| O  | 11.6556680000 | 4.1671990000  | 10.2673480000 |
| O  | 7.0487780000  | -0.3471860000 | 10.0131500000 |
| C  | 6.6243480000  | 5.2985760000  | 10.1629560000 |
| C  | 8.9881130000  | 4.4005700000  | 7.5502940000  |
| C  | 8.1151150000  | 5.2228620000  | 8.3279810000  |
| C  | 9.7190370000  | 4.8677090000  | 6.4257210000  |
| H  | 9.6222960000  | 5.8973090000  | 6.1014270000  |
| C  | 6.6434670000  | 6.7145610000  | 10.1850670000 |
| C  | 7.3637350000  | 7.3700890000  | 9.1420110000  |
| H  | 7.3579680000  | 8.4566610000  | 9.1028340000  |
| C  | 9.9158910000  | 2.2423960000  | 7.2481560000  |
| C  | 8.4063380000  | 2.5856650000  | 11.7138440000 |
| C  | 8.0624350000  | 6.6500600000  | 8.2206020000  |
| H  | 8.6259940000  | 7.1600940000  | 7.4481560000  |
| C  | 10.5315120000 | 4.0038640000  | 5.7369170000  |
| H  | 11.0863740000 | 4.3548570000  | 4.8714120000  |

|    |               |              |               |
|----|---------------|--------------|---------------|
| C  | 10.6392200000 | 2.6582060000 | 6.1441730000  |
| H  | 11.2677900000 | 1.9567160000 | 5.6072260000  |
| C  | 11.2634490000 | 3.1021880000 | 10.2771500000 |
| C  | 9.9622630000  | 0.8184320000 | 7.7303080000  |
| H  | 10.1810060000 | 0.7718580000 | 8.8036860000  |
| H  | 10.7284890000 | 0.2464870000 | 7.2005990000  |
| H  | 8.9953460000  | 0.3284790000 | 7.5650850000  |
| C  | 7.2691900000  | 0.7756890000 | 9.8595030000  |
| N  | 5.8845080000  | 4.5838090000 | 11.0612690000 |
| N  | 4.8157090000  | 3.0162460000 | 12.8385960000 |
| C  | 4.8783650000  | 4.3578980000 | 13.1857150000 |
| C  | 5.3706670000  | 5.2273070000 | 12.1727400000 |
| C  | 4.5354770000  | 4.7744890000 | 14.4951580000 |
| H  | 4.5542760000  | 5.8272800000 | 14.7522530000 |
| C  | 5.9814430000  | 7.3726930000 | 11.2569060000 |
| H  | 5.9817580000  | 8.4596300000 | 11.2875080000 |
| C  | 4.5630040000  | 2.0960520000 | 13.8002680000 |
| C  | 5.3938460000  | 6.6533990000 | 12.2571470000 |
| H  | 4.9230490000  | 7.1554510000 | 13.0941870000 |
| C  | 4.2304830000  | 3.8320540000 | 15.4416640000 |
| H  | 3.9846060000  | 4.1337020000 | 16.4555620000 |
| C  | 4.2751900000  | 2.4644310000 | 15.1021430000 |
| H  | 4.0831470000  | 1.6990270000 | 15.8455400000 |
| C  | 4.5972150000  | 0.6417960000 | 13.4245160000 |
| H  | 3.6887010000  | 0.3505170000 | 12.8866430000 |
| H  | 4.6610550000  | 0.0210140000 | 14.3218530000 |
| H  | 5.4578690000  | 0.4154970000 | 12.7875020000 |
| Mn | 4.8444280000  | 2.8706870000 | 10.7922620000 |
| O  | 4.7772560000  | 2.7482860000 | 7.8111830000  |
| O  | 1.8329470000  | 4.1908210000 | 10.8816290000 |
| O  | 3.6987170000  | 0.1869000000 | 10.1210380000 |
| C  | 4.8767440000  | 2.8184020000 | 8.9612000000  |
| C  | 2.9303920000  | 3.9008210000 | 10.8375370000 |
| C  | 4.1468930000  | 1.1912540000 | 10.4711370000 |

M2L2-singlet.xyz

|    |               |               |               |
|----|---------------|---------------|---------------|
| Mn | -1.4571100000 | -0.0164120000 | 0.0142180000  |
| Mn | 1.4570340000  | 0.0163780000  | 0.0142410000  |
| N  | 1.0000920000  | -1.8128060000 | 0.5890030000  |
| N  | 2.7381290000  | -0.2259290000 | 1.5967880000  |
| N  | -2.7118190000 | -0.2706330000 | -1.5965840000 |
| N  | -2.7379960000 | 0.2256740000  | 1.5969220000  |
| N  | 2.7118760000  | 0.2708620000  | -1.5965850000 |
| N  | 0.9596030000  | 1.8367080000  | -0.5688710000 |
| N  | -1.0000370000 | 1.8126880000  | 0.5892180000  |
| N  | -0.9594020000 | -1.8365790000 | -0.5692970000 |
| C  | 0.0368040000  | -2.5450540000 | -0.0056470000 |
| C  | -1.8596690000 | -2.4713170000 | -1.4195540000 |
| C  | 1.9292710000  | -2.4398480000 | 1.4088470000  |
| C  | -1.9292370000 | 2.4396220000  | 1.4088430000  |
| C  | 1.8597750000  | 2.4715450000  | -1.4191360000 |
| C  | -0.0714240000 | 3.9708640000  | -0.0313250000 |
| C  | 2.8362630000  | -1.5207280000 | 2.0375360000  |
| C  | 2.7925780000  | 1.5751800000  | -2.0267550000 |
| C  | -2.8362080000 | 1.5204510000  | 2.0377400000  |
| C  | -2.7924770000 | -1.5748850000 | -2.0270230000 |
| C  | -0.0367610000 | 2.5450540000  | -0.0053270000 |
| C  | 3.5271770000  | 0.7267110000  | 2.1506320000  |
| C  | -1.8227180000 | -3.8615930000 | -1.5520920000 |
| H  | -2.5369980000 | -4.3653490000 | -2.1958300000 |
| C  | 3.5403690000  | -0.6589710000 | -2.1408620000 |
| C  | 0.0713100000  | -3.9708760000 | -0.0316430000 |
| C  | -3.5270900000 | -0.7270200000 | 2.1506000000  |
| C  | 1.0689560000  | -4.5968870000 | 0.7527270000  |
| H  | 1.1145890000  | -5.6815250000 | 0.7912600000  |



|   |               |               |               |
|---|---------------|---------------|---------------|
| C | -4.4454190000 | -0.4237670000 | 3.1416450000  |
| H | -5.0635220000 | -1.2103140000 | 3.5601200000  |
| C | 1.9618270000  | -3.8298620000 | 1.4907880000  |
| H | 2.7047250000  | -4.3217670000 | 2.1107280000  |
| C | -3.7648600000 | 1.8748150000  | 3.0356120000  |
| H | -3.8278780000 | 2.9018980000  | 3.3771620000  |
| C | -0.8979480000 | -4.6123600000 | -0.8442770000 |
| H | -0.8898210000 | -5.6954090000 | -0.9279990000 |
| C | -3.7428100000 | -1.9533020000 | -3.0029030000 |
| H | -3.7975850000 | -2.9847430000 | -3.3326550000 |
| C | 4.4693840000  | -0.3310860000 | -3.1089790000 |
| H | 5.1114120000  | -1.1016960000 | -3.5214510000 |
| C | 0.8977890000  | 4.6124720000  | -0.8439050000 |
| H | 0.8895450000  | 5.6955200000  | -0.9276200000 |
| C | -1.0691730000 | 4.5967700000  | 0.7530250000  |
| H | -1.1149050000 | 5.6814030000  | 0.7915750000  |
| C | -1.9619370000 | 3.8296470000  | 1.4910850000  |
| H | -2.7048800000 | 4.3214450000  | 2.1110590000  |
| C | 1.8226740000  | 3.8618110000  | -1.5516900000 |
| H | 2.5368690000  | 4.3656440000  | -2.1954610000 |
| C | -4.5675750000 | 0.9011020000  | 3.5824660000  |
| H | -5.2844350000 | 1.1547710000  | 4.3578630000  |
| C | -3.3862340000 | -2.1281010000 | 1.6324600000  |
| H | -3.6648950000 | -2.1811360000 | 0.5747650000  |
| H | -4.0320130000 | -2.8110450000 | 2.1901080000  |
| H | -2.3539250000 | -2.4805520000 | 1.7159950000  |
| C | 3.4205740000  | -2.0653090000 | -1.6321090000 |
| H | 3.7049940000  | -2.1215370000 | -0.5758120000 |
| H | 4.0723460000  | -2.7372260000 | -2.1962780000 |
| H | 2.3921440000  | -2.4304370000 | -1.7128540000 |
| C | 3.7429560000  | 1.9537490000  | -3.0025240000 |
| H | 3.7977790000  | 2.9852370000  | -3.3321150000 |
| C | -3.5403270000 | 0.6592790000  | -2.1407690000 |
| C | 3.3864180000  | 2.1278130000  | 1.6325400000  |
| H | 3.6646880000  | 2.1808160000  | 0.5747510000  |
| H | 4.0325250000  | 2.8106330000  | 2.1899610000  |
| H | 2.3541960000  | 2.4804480000  | 1.7164790000  |
| C | 4.4453280000  | 0.4233820000  | 3.1418170000  |
| H | 5.0633870000  | 1.2098900000  | 3.5604310000  |
| C | 4.5674110000  | -0.9015160000 | 3.5825520000  |
| H | 5.2841360000  | -1.1552480000 | 4.3580540000  |
| C | 4.5741280000  | 1.0035340000  | -3.5391160000 |
| H | 5.3031510000  | 1.2774720000  | -4.2961550000 |
| C | 3.7647880000  | -1.8751860000 | 3.0354840000  |
| H | 3.8278100000  | -2.9023020000 | 3.3769320000  |
| C | -4.5739460000 | -1.0030140000 | -3.5394020000 |
| H | -5.3029200000 | -1.2768210000 | -4.2965340000 |
| C | -4.4692340000 | 0.3315450000  | -3.1090220000 |
| H | -5.1112190000 | 1.1022250000  | -3.5214310000 |
| C | -3.4207680000 | 2.0654970000  | -1.6316290000 |
| H | -3.7055920000 | 2.1214030000  | -0.5754170000 |
| H | -4.0723830000 | 2.7375190000  | -2.1958540000 |
| H | -2.3923440000 | 2.4307360000  | -1.7118660000 |

M2L2-singlet-BS.xyz

|    |               |               |               |
|----|---------------|---------------|---------------|
| Mn | 1.4577980000  | -0.0675700000 | -0.0422220000 |
| Mn | -1.4577110000 | 0.0678310000  | -0.0425850000 |
| N  | -0.9332230000 | 1.9566610000  | 0.6258010000  |
| N  | -2.9048880000 | 0.4749740000  | 1.5757730000  |
| N  | 2.8696960000  | 0.3510220000  | -1.6487330000 |
| N  | 2.9047720000  | -0.4750420000 | 1.5768150000  |
| N  | -2.8696220000 | -0.3509840000 | -1.6486750000 |
| N  | -1.0326890000 | -1.9085300000 | -0.5504580000 |
| N  | 0.9334520000  | -1.9566100000 | 0.6259220000  |
| N  | 1.0330240000  | 1.9087210000  | -0.5502220000 |

|   |               |               |               |
|---|---------------|---------------|---------------|
| C | 0.0818160000  | 2.6461440000  | 0.0640020000  |
| C | 1.9995500000  | 2.5430540000  | -1.3314870000 |
| C | -1.8667080000 | 2.6133370000  | 1.4239870000  |
| C | 1.8668090000  | -2.6133890000 | 1.4242170000  |
| C | -1.9995080000 | -2.5429580000 | -1.3313370000 |
| C | -0.1436960000 | -4.0727280000 | 0.1166990000  |
| C | -2.8922900000 | 1.7789250000  | 1.9887090000  |
| C | -2.9383630000 | -1.6758490000 | -1.9838660000 |
| C | 2.8923640000  | -1.7791310000 | 1.9892190000  |
| C | 2.9381910000  | 1.6758510000  | -1.9842050000 |
| C | -0.0816240000 | -2.6459950000 | 0.0640150000  |
| C | -3.8379680000 | -0.3785590000 | 2.0542250000  |
| C | 2.0603760000  | 3.9397060000  | -1.3656660000 |
| H | 2.8287650000  | 4.4373870000  | -1.9481410000 |
| C | -3.7364000000 | 0.5351360000  | -2.1892710000 |
| C | 0.1436760000  | 4.0728780000  | 0.1164680000  |
| C | 3.8378840000  | 0.3783850000  | 2.0554000000  |
| C | -0.8301050000 | 4.7317600000  | 0.9052390000  |
| H | -0.7997330000 | 5.8143540000  | 0.9925550000  |
| C | 4.7986960000  | -0.0247080000 | 2.9661180000  |
| H | 5.5310950000  | 0.6849690000  | 3.3350550000  |
| C | -1.8023540000 | 4.0019230000  | 1.5675660000  |
| H | -2.5330320000 | 4.5220830000  | 2.1781750000  |
| C | 3.8612560000  | -2.2381530000 | 2.9133770000  |
| H | 3.8508820000  | -3.2682960000 | 3.2497930000  |
| C | 1.1702950000  | 4.7010250000  | -0.6291710000 |
| H | 1.2390990000  | 5.7853700000  | -0.6314980000 |
| C | 3.9119360000  | 2.1165320000  | -2.9142040000 |
| H | 3.9583800000  | 3.1599560000  | -3.2036960000 |
| C | -4.7053420000 | 0.1483340000  | -3.0962250000 |
| H | -5.3855870000 | 0.8819030000  | -3.5147180000 |
| C | -1.1704430000 | -4.7008940000 | -0.6287370000 |
| H | -1.2393940000 | -5.7852300000 | -0.6308220000 |
| C | 0.8300110000  | -4.7316940000 | 0.9054730000  |
| H | 0.7994720000  | -5.8142770000 | 0.9928600000  |
| C | 1.8023600000  | -4.0019680000 | 1.5677460000  |
| H | 2.5329440000  | -4.5222060000 | 2.1783960000  |
| C | -2.0605500000 | -3.9396060000 | -1.3651990000 |
| H | -2.8291480000 | -4.4372880000 | -1.9473910000 |
| C | 4.8036650000  | -1.3623390000 | 3.3947490000  |
| H | 5.5469760000  | -1.7024940000 | 4.1102170000  |
| C | 3.7998580000  | 1.7860240000  | 1.5305700000  |
| H | 4.1008070000  | 1.8107770000  | 0.4775000000  |
| H | 4.4786780000  | 2.4329820000  | 2.0923800000  |
| H | 2.7899720000  | 2.2030990000  | 1.5918480000  |
| C | -3.6025640000 | 1.9606710000  | -1.7340770000 |
| H | -3.8235920000 | 2.0464800000  | -0.6639680000 |
| H | -4.2896170000 | 2.6148420000  | -2.2771400000 |
| H | -2.5826410000 | 2.3286860000  | -1.8892250000 |
| C | -3.9125350000 | -2.1165560000 | -2.9134260000 |
| H | -3.9591960000 | -3.1600100000 | -3.2027670000 |
| C | 3.7364320000  | -0.5350590000 | -2.1895020000 |
| C | -3.7999980000 | -1.7860200000 | 1.5289440000  |
| H | -4.1009530000 | -1.8104210000 | 0.4758650000  |
| H | -4.4788400000 | -2.4331380000 | 2.0905460000  |
| H | -2.7901440000 | -2.2031690000 | 1.5901560000  |
| C | -4.7985530000 | 0.0242360000  | 2.9653100000  |
| H | -5.5308740000 | -0.6855560000 | 3.3341800000  |
| C | -4.8034070000 | 1.3617350000  | 3.3943770000  |
| H | -5.5465400000 | 1.7016600000  | 4.1101400000  |
| C | -4.7842550000 | -1.2079890000 | -3.4605420000 |
| H | -5.5306440000 | -1.5358660000 | -4.1785200000 |
| C | -3.8610580000 | 2.2376810000  | 2.9131240000  |
| H | -3.8505300000 | 3.2677090000  | 3.2498960000  |
| C | 4.7834960000  | 1.2079750000  | -3.4615810000 |
| H | 5.5295310000  | 1.5358140000  | -4.1799430000 |

|   |              |               |               |
|---|--------------|---------------|---------------|
| C | 4.7049050000 | -0.1482720000 | -3.0969780000 |
| H | 5.3850760000 | -0.8818190000 | -3.5156310000 |
| C | 3.6032380000 | -1.9605590000 | -1.7339940000 |
| H | 3.8246100000 | -2.0460910000 | -0.6639480000 |
| H | 4.2903770000 | -2.6145640000 | -2.2771480000 |
| H | 2.5834080000 | -2.3289710000 | -1.8887940000 |

M2L2-triplet.xyz

|    |               |               |               |
|----|---------------|---------------|---------------|
| Mn | -1.4198750000 | 0.0254180000  | -0.0163440000 |
| Mn | 1.4731620000  | -0.0184770000 | -0.0134180000 |
| N  | 0.9596870000  | -1.7902610000 | 0.6952890000  |
| N  | 2.6901500000  | -0.1495420000 | 1.6343260000  |
| N  | -2.7734820000 | -0.3656460000 | -1.5567340000 |
| N  | -2.7295630000 | 0.4152590000  | 1.5430740000  |
| N  | 2.7361560000  | 0.1148910000  | -1.6259970000 |
| N  | 1.0069480000  | 1.7683880000  | -0.7143700000 |
| N  | -0.9628890000 | 1.8931170000  | 0.4340470000  |
| N  | -1.0157640000 | -1.8695840000 | -0.4479590000 |
| C  | -0.0215780000 | -2.5469880000 | 0.1593890000  |
| C  | -1.9126820000 | -2.5505640000 | -1.2582230000 |
| C  | 1.8734830000  | -2.3689000000 | 1.5692380000  |
| C  | -1.8309700000 | 2.5851340000  | 1.2681620000  |
| C  | 1.9343120000  | 2.3367600000  | -1.5811030000 |
| C  | 0.1060710000  | 3.9720690000  | -0.2182830000 |
| C  | 2.7885580000  | -1.4278690000 | 2.1343210000  |
| C  | 2.8342300000  | 1.3792350000  | -2.1511940000 |
| C  | -2.7717830000 | 1.7331690000  | 1.9295520000  |
| C  | -2.8468300000 | -1.6866290000 | -1.9201530000 |
| C  | 0.0483240000  | 2.5482330000  | -0.1682380000 |
| C  | 3.4990920000  | 0.8222830000  | 2.1338000000  |
| C  | -1.8844760000 | -3.9451840000 | -1.3109350000 |
| H  | -2.5950090000 | -4.4833040000 | -1.9301160000 |
| C  | 3.5212080000  | -0.8744330000 | -2.1217180000 |
| C  | -0.0048880000 | -3.9708010000 | 0.2295550000  |
| C  | -3.5764760000 | -0.4708650000 | 2.1264670000  |
| C  | 0.9781670000  | -4.5553030000 | 1.0680620000  |
| H  | 1.0021860000  | -5.6348640000 | 1.1869490000  |
| C  | -4.4876590000 | -0.0826290000 | 3.0922420000  |
| H  | -5.1483370000 | -0.8199300000 | 3.5348470000  |
| C  | 1.8752070000  | -3.7543060000 | 1.7551840000  |
| H  | 2.6011400000  | -4.2123750000 | 2.4195230000  |
| C  | -3.6905050000 | 2.1716500000  | 2.9073200000  |
| H  | -3.7061920000 | 3.2134770000  | 3.2068380000  |
| C  | -0.9717510000 | -4.6558660000 | -0.5461160000 |
| H  | -0.9727900000 | -5.7421740000 | -0.5584180000 |
| C  | -3.7936860000 | -2.1193530000 | -2.8725210000 |
| H  | -3.8377270000 | -3.1641390000 | -3.1582400000 |
| C  | 4.4320440000  | -0.6401850000 | -3.1361040000 |
| H  | 5.0460180000  | -1.4536540000 | -3.5064580000 |
| C  | 1.1021420000  | 4.5405010000  | -1.0500250000 |
| H  | 1.1587180000  | 5.6203930000  | -1.1528540000 |
| C  | -0.8373330000 | 4.6726490000  | 0.5743160000  |
| H  | -0.8062720000 | 5.7581660000  | 0.6031150000  |
| C  | -1.7631290000 | 3.9776820000  | 1.3373800000  |
| H  | -2.4519910000 | 4.5267940000  | 1.9714610000  |
| C  | 1.9761910000  | 3.7211990000  | -1.7487880000 |
| H  | 2.7186540000  | 4.1657650000  | -2.4040580000 |
| C  | -4.5449140000 | 1.2641550000  | 3.4833060000  |
| H  | -5.2538990000 | 1.5835740000  | 4.2415120000  |
| C  | -3.5045550000 | -1.9000520000 | 1.6743700000  |
| H  | -3.7940170000 | -1.9908160000 | 0.6224990000  |
| H  | -4.1779630000 | -2.5247130000 | 2.2668360000  |
| H  | -2.4896800000 | -2.2969130000 | 1.7691970000  |
| C  | 3.3816220000  | -2.2370860000 | -1.5083860000 |
| H  | 3.6632220000  | -2.2173030000 | -0.4501580000 |

|   |               |               |               |
|---|---------------|---------------|---------------|
| H | 4.0250930000  | -2.9576850000 | -2.0193990000 |
| H | 2.3488730000  | -2.5944450000 | -1.5642640000 |
| C | 3.7594370000  | 1.6639240000  | -3.1772870000 |
| H | 3.8235880000  | 2.6662170000  | -3.5862450000 |
| C | -3.6179730000 | 0.5292910000  | -2.1263040000 |
| C | 3.3596270000  | 2.1966190000  | 1.5481180000  |
| H | 3.6314430000  | 2.1960300000  | 0.4868120000  |
| H | 4.0093900000  | 2.9060950000  | 2.0668350000  |
| H | 2.3278990000  | 2.5548130000  | 1.6197670000  |
| C | 4.4252210000  | 0.5613400000  | 3.1243800000  |
| H | 5.0520200000  | 1.3629550000  | 3.4994590000  |
| C | 4.5499690000  | -0.7476510000 | 3.6244230000  |
| H | 5.2785640000  | -0.9685200000 | 4.3990310000  |
| C | 4.5544120000  | 0.6546890000  | -3.6641090000 |
| H | 5.2666150000  | 0.8544680000  | -4.4594150000 |
| C | 3.7392090000  | -1.7390360000 | 3.1333120000  |
| H | 3.8090810000  | -2.7513680000 | 3.5158350000  |
| C | -4.6421490000 | -1.2018130000 | -3.4433920000 |
| H | -5.3721550000 | -1.5180880000 | -4.1826990000 |
| C | -4.5553630000 | 0.1479270000  | -3.0698090000 |
| H | -5.2141640000 | 0.8909320000  | -3.5055420000 |
| C | -3.5125120000 | 1.9571040000  | -1.6764280000 |
| H | -3.7853320000 | 2.0506700000  | -0.6199080000 |
| H | -4.1808990000 | 2.5962430000  | -2.2589330000 |
| H | -2.4908340000 | 2.3332040000  | -1.7841850000 |

M2L2-quintet.xyz

|    |               |               |               |
|----|---------------|---------------|---------------|
| Mn | -1.4272190000 | -0.0001230000 | 0.0000580000  |
| Mn | 1.4234340000  | 0.0001450000  | 0.0000840000  |
| N  | 0.9724150000  | -1.8460770000 | 0.5491210000  |
| N  | 2.7303850000  | -0.2907320000 | 1.5764760000  |
| N  | -2.7026020000 | -0.2385800000 | -1.7091040000 |
| N  | -2.7026670000 | 0.2382700000  | 1.7091300000  |
| N  | 2.7303810000  | 0.2910050000  | -1.5763780000 |
| N  | 0.9721080000  | 1.8461940000  | -0.5492200000 |
| N  | -1.0313900000 | 1.8456230000  | 0.5591320000  |
| N  | -1.0311780000 | -1.8457890000 | -0.5590680000 |
| C  | -0.0216010000 | -2.5623020000 | -0.0204760000 |
| C  | -1.9423780000 | -2.4647980000 | -1.4103540000 |
| C  | 1.9015600000  | -2.4935620000 | 1.3560880000  |
| C  | -1.9427650000 | 2.4645700000  | 1.4102640000  |
| C  | 1.9011710000  | 2.4937480000  | -1.3562040000 |
| C  | -0.0140730000 | 3.9877310000  | 0.0472210000  |
| C  | 2.8279710000  | -1.5988960000 | 1.9809870000  |
| C  | 2.8277800000  | 1.5991780000  | -1.9809540000 |
| C  | -2.8420450000 | 1.5551950000  | 2.0607950000  |
| C  | -2.8417900000 | -1.5555010000 | -2.0608340000 |
| C  | -0.0220140000 | 2.5622840000  | 0.0203580000  |
| C  | 3.5388710000  | 0.6414500000  | 2.1415920000  |
| C  | -1.9267570000 | -3.8545390000 | -1.5411570000 |
| H  | -2.6439430000 | -4.3485680000 | -2.1888190000 |
| C  | 3.5391080000  | -0.6410390000 | -2.1413930000 |
| C  | -0.0133510000 | -3.9877470000 | -0.0475550000 |
| C  | -3.4919540000 | -0.6981890000 | 2.2864080000  |
| C  | 0.9859080000  | -4.6345460000 | 0.7208760000  |
| H  | 1.0057620000  | -5.7198830000 | 0.7628520000  |
| C  | -4.4484310000 | -0.3646750000 | 3.2289040000  |
| H  | -5.0618040000 | -1.1394270000 | 3.6756960000  |
| C  | 1.9044980000  | -3.8872270000 | 1.4400430000  |
| H  | 2.6451490000  | -4.3944020000 | 2.0502180000  |
| C  | -3.8169390000 | 1.9426550000  | 3.0072860000  |
| H  | -3.9264820000 | 2.9859880000  | 3.2803670000  |
| C  | -1.0070140000 | -4.6168290000 | -0.8383660000 |
| H  | -1.0149750000 | -5.7000580000 | -0.9194130000 |
| C  | -3.8166410000 | -1.9430600000 | -3.0073220000 |

|   |               |               |               |
|---|---------------|---------------|---------------|
| H | -3.9260520000 | -2.9863970000 | -3.2804400000 |
| C | 4.4730230000  | -0.3071320000 | -3.1048330000 |
| H | 5.1035540000  | -1.0783140000 | -3.5334740000 |
| C | 0.9850390000  | 4.6346260000  | -0.7213150000 |
| H | 1.0046560000  | 5.7199620000  | -0.7634600000 |
| C | -1.0078680000 | 4.6167160000  | 0.8379460000  |
| H | -1.0160730000 | 5.6999570000  | 0.9188160000  |
| C | -1.9274510000 | 3.8543450000  | 1.5408420000  |
| H | -2.6447740000 | 4.3483310000  | 2.1883830000  |
| C | 1.9038150000  | 3.8874110000  | -1.4403470000 |
| H | 2.6443680000  | 4.3946790000  | -2.0505620000 |
| C | -4.6121610000 | 0.9832290000  | 3.5856980000  |
| H | -5.3614910000 | 1.2656960000  | 4.3194880000  |
| C | -3.2927390000 | -2.1205380000 | 1.8484630000  |
| H | -3.5457610000 | -2.2407500000 | 0.7889380000  |
| H | -3.9235390000 | -2.7984250000 | 2.4291980000  |
| H | -2.2488950000 | -2.4261350000 | 1.9712050000  |
| C | 3.4010040000  | -2.0558240000 | -1.6612820000 |
| H | 3.6941020000  | -2.1382450000 | -0.6094560000 |
| H | 4.0376090000  | -2.7248500000 | -2.2457680000 |
| H | 2.3670180000  | -2.4044390000 | -1.7402410000 |
| C | 3.7810080000  | 1.9856790000  | -2.9483290000 |
| H | 3.8491420000  | 3.0220600000  | -3.2591960000 |
| C | -3.4920400000 | 0.6977970000  | -2.2863020000 |
| C | 3.4005000000  | 2.0562280000  | 1.6615250000  |
| H | 3.6933690000  | 2.1387340000  | 0.6096400000  |
| H | 4.0371270000  | 2.7253240000  | 2.2459070000  |
| H | 2.3664830000  | 2.4047030000  | 1.7407190000  |
| C | 4.4728000000  | 0.3076640000  | 3.1050640000  |
| H | 5.1031850000  | 1.0789300000  | 3.5337680000  |
| C | 4.5981060000  | -1.0325470000 | 3.5054190000  |
| H | 5.3304320000  | -1.3113760000 | 4.2574640000  |
| C | 4.5981270000  | 1.0330810000  | -3.5052420000 |
| H | 5.3304530000  | 1.3120030000  | -4.2572520000 |
| C | 3.7811900000  | -1.9852740000 | 2.9484150000  |
| H | 3.8494810000  | -3.0216560000 | 3.2592500000  |
| C | -4.6120150000 | -0.9837150000 | -3.5856680000 |
| H | -5.3613220000 | -1.2662600000 | -4.3194530000 |
| C | -4.4484820000 | 0.3641900000  | -3.2288070000 |
| H | -5.0619780000 | 1.1388720000  | -3.6755520000 |
| C | -3.2931040000 | 2.1201430000  | -1.8482140000 |
| H | -3.5465760000 | 2.2402550000  | -0.7887830000 |
| H | -3.9237380000 | 2.7980050000  | -2.4291560000 |
| H | -2.2492430000 | 2.4258490000  | -1.9705020000 |

M2L2-septet.xyz

|    |               |               |               |
|----|---------------|---------------|---------------|
| Mn | -1.4706980000 | 0.0291730000  | -0.0732450000 |
| Mn | 1.4350360000  | 0.0192020000  | 0.0419400000  |
| N  | 0.9076100000  | -2.0267920000 | 0.1832420000  |
| N  | 2.8580350000  | -0.8030830000 | 1.4733350000  |
| N  | -2.6949380000 | 0.1479910000  | -1.7364030000 |
| N  | -2.7125610000 | -0.1888670000 | 1.7576240000  |
| N  | 2.8608910000  | 0.8571530000  | -1.4338550000 |
| N  | 0.9063670000  | 2.0512120000  | -0.1203800000 |
| N  | -1.0672020000 | 1.6857890000  | 0.9708210000  |
| N  | -1.0515680000 | -1.6969140000 | -0.9697930000 |
| C  | -0.1018020000 | -2.5741180000 | -0.5325500000 |
| C  | -2.0123270000 | -2.1191410000 | -1.8617460000 |
| C  | 1.8452140000  | -2.8433870000 | 0.7753920000  |
| C  | -2.0485360000 | 2.0925270000  | 1.8740620000  |
| C  | 1.7961950000  | 2.8886570000  | -0.7896680000 |
| C  | -0.2987430000 | 3.9814460000  | 0.7429850000  |
| C  | 2.8692270000  | -2.1803530000 | 1.5162740000  |
| C  | 2.8369400000  | 2.2210280000  | -1.5226320000 |
| C  | -2.8729150000 | 1.0183020000  | 2.3751180000  |

|   |               |               |               |
|---|---------------|---------------|---------------|
| C | -2.8886780000 | -1.0939930000 | -2.3137190000 |
| C | -0.1445650000 | 2.5735810000  | 0.5271110000  |
| C | 3.7980100000  | -0.1000550000 | 2.1422030000  |
| C | -2.0951230000 | -3.4993980000 | -2.2256480000 |
| H | -2.8720720000 | -3.8349710000 | -2.9030220000 |
| C | 3.7994630000  | 0.1487970000  | -2.0992540000 |
| C | -0.1788630000 | -3.9517130000 | -0.8128180000 |
| C | -3.4366670000 | -1.2534390000 | 2.1640720000  |
| C | 0.8075390000  | -4.7931820000 | -0.2129590000 |
| H | 0.7682610000  | -5.8645320000 | -0.3937810000 |
| C | -4.3526240000 | -1.1602340000 | 3.2002890000  |
| H | -4.9179120000 | -2.0342700000 | 3.5047160000  |
| C | 1.7785130000  | -4.2600740000 | 0.5802190000  |
| H | 2.5209700000  | -4.9052440000 | 1.0358460000  |
| C | -3.7910380000 | 1.1634940000  | 3.4354180000  |
| H | -3.8969930000 | 2.1183890000  | 3.9377030000  |
| C | -1.2202040000 | -4.3930750000 | -1.6829330000 |
| H | -1.2919190000 | -5.4508910000 | -1.9238150000 |
| C | -3.8969400000 | -1.2744400000 | -3.2941330000 |
| H | -4.0503390000 | -2.2509520000 | -3.7399770000 |
| C | 4.7626960000  | 0.7618370000  | -2.8806740000 |
| H | 5.5004880000  | 0.1651260000  | -3.4058200000 |
| C | 0.6363250000  | 4.8228840000  | 0.0885060000  |
| H | 0.5400790000  | 5.9010770000  | 0.1813680000  |
| C | -1.3599150000 | 4.3882650000  | 1.5784570000  |
| H | -1.5026000000 | 5.4457160000  | 1.7824650000  |
| C | -2.1945600000 | 3.4395520000  | 2.1716360000  |
| H | -2.9753420000 | 3.7681760000  | 2.8505110000  |
| C | 1.6469180000  | 4.2735070000  | -0.6834120000 |
| H | 2.3380410000  | 4.9356670000  | -1.1949980000 |
| C | -4.5286120000 | 0.0739240000  | 3.8396690000  |
| H | -5.2354710000 | 0.1681070000  | 4.6591010000  |
| C | -3.2126950000 | -2.5472460000 | 1.4350500000  |
| H | -3.4979850000 | -2.4532000000 | 0.3814810000  |
| H | -3.8034280000 | -3.3527770000 | 1.8786560000  |
| H | -2.1568320000 | -2.8348930000 | 1.4658140000  |
| C | 3.7541060000  | -1.3434430000 | -1.9322130000 |
| H | 4.0373180000  | -1.6254290000 | -0.9119070000 |
| H | 4.4402570000  | -1.8389400000 | -2.6241400000 |
| H | 2.7444150000  | -1.7275300000 | -2.1118750000 |
| C | 3.8087970000  | 2.8929570000  | -2.3028170000 |
| H | 3.7972630000  | 3.9741410000  | -2.3787740000 |
| C | -3.4529280000 | 1.1983430000  | -2.1393340000 |
| C | 3.7247370000  | 1.3960360000  | 2.0155780000  |
| H | 3.9737870000  | 1.7083560000  | 0.9948860000  |
| H | 4.4230550000  | 1.8854240000  | 2.6997330000  |
| H | 2.7147170000  | 1.7591840000  | 2.2330660000  |
| C | 4.7898020000  | -0.7159160000 | 2.8833210000  |
| H | 5.5269950000  | -0.1194040000 | 3.4096520000  |
| C | 4.8216160000  | -2.1256940000 | 2.9329030000  |
| H | 5.5917040000  | -2.6324960000 | 3.5076630000  |
| C | 4.7602690000  | 2.1631110000  | -2.9734970000 |
| H | 5.5063780000  | 2.6697670000  | -3.5792130000 |
| C | 3.8763480000  | -2.8537590000 | 2.2576810000  |
| H | 3.8914350000  | -3.9369650000 | 2.2998240000  |
| C | -4.6584020000 | -0.2045330000 | -3.6838770000 |
| H | -5.4291240000 | -0.3274630000 | -4.4392500000 |
| C | -4.4303950000 | 1.0631050000  | -3.1054810000 |
| H | -5.0139810000 | 1.9262160000  | -3.4063500000 |
| C | -3.1843280000 | 2.5218680000  | -1.4820200000 |
| H | -3.4072870000 | 2.4813000000  | -0.4099080000 |
| H | -3.7982970000 | 3.3081250000  | -1.9286330000 |
| H | -2.1315810000 | 2.8042370000  | -1.5879030000 |

|    |               |               |               |
|----|---------------|---------------|---------------|
| Mn | -1.4600110000 | 0.0553360000  | -0.1030010000 |
| Mn | 1.5000100000  | 0.0774580000  | 0.0836210000  |
| N  | 0.9418290000  | -1.9042950000 | 0.6797330000  |
| N  | 2.8690280000  | -0.3622020000 | 1.6632250000  |
| N  | -2.9087990000 | -0.4381830000 | -1.6048850000 |
| N  | -2.8261840000 | 0.4526970000  | 1.6322560000  |
| N  | 2.8269510000  | 0.3771420000  | -1.6633710000 |
| N  | 0.9722450000  | 1.9452410000  | -0.6554710000 |
| N  | -0.9403540000 | 1.9724590000  | 0.5803260000  |
| N  | -0.9532150000 | -1.9319070000 | -0.6181940000 |
| C  | 0.0024220000  | -2.6431230000 | 0.0342300000  |
| C  | -1.8974870000 | -2.5859040000 | -1.3780790000 |
| C  | 1.8951770000  | -2.5319120000 | 1.4494680000  |
| C  | -1.8716040000 | 2.6216150000  | 1.3892970000  |
| C  | 1.8980580000  | 2.5625280000  | -1.4946670000 |
| C  | 0.0213280000  | 4.1084640000  | -0.0756290000 |
| C  | 2.8903050000  | -1.6912660000 | 2.0335840000  |
| C  | 2.8446680000  | 1.6709070000  | -2.1083670000 |
| C  | -2.8291650000 | 1.7590840000  | 2.0324030000  |
| C  | -2.9120510000 | -1.7693760000 | -1.9632490000 |
| C  | 0.0156650000  | 2.6743680000  | -0.0499430000 |
| C  | 3.7961200000  | 0.4926120000  | 2.1544370000  |
| C  | -1.8680750000 | -4.0139920000 | -1.4786740000 |
| H  | -2.6008590000 | -4.5304980000 | -2.0876910000 |
| C  | 3.6810690000  | -0.5311380000 | -2.1847810000 |
| C  | 0.0163540000  | -4.0539870000 | 0.0401660000  |
| C  | -3.6893540000 | -0.4274240000 | 2.1803670000  |
| C  | 0.9972660000  | -4.6966780000 | 0.8503740000  |
| H  | 1.0141800000  | -5.7829710000 | 0.8960510000  |
| C  | -4.5991110000 | -0.0506680000 | 3.1551150000  |
| H  | -5.2771260000 | -0.7822450000 | 3.5807370000  |
| C  | 1.8968420000  | -3.9601860000 | 1.5604500000  |
| H  | 2.6404580000  | -4.4569930000 | 2.1726130000  |
| C  | -3.7408030000 | 2.1923260000  | 3.0228010000  |
| H  | -3.7336060000 | 3.2226500000  | 3.3594650000  |
| C  | -0.9506920000 | -4.7248110000 | -0.7655860000 |
| H  | -0.9421580000 | -5.8114200000 | -0.8046950000 |
| C  | -3.9139070000 | -2.2550200000 | -2.8460500000 |
| H  | -3.9208880000 | -3.2972360000 | -3.1436090000 |
| C  | 4.5884010000  | -0.1978060000 | -3.1747590000 |
| H  | 5.2577020000  | -0.9503590000 | -3.5770740000 |
| C  | 0.9907730000  | 4.7241110000  | -0.9003990000 |
| H  | 1.0142190000  | 5.8077700000  | -0.9770190000 |
| C  | -0.9472880000 | 4.7560200000  | 0.7261580000  |
| H  | -0.9662100000 | 5.8417030000  | 0.7669420000  |
| C  | -1.8614410000 | 4.0121510000  | 1.4656050000  |
| H  | -2.5893710000 | 4.5316940000  | 2.0807250000  |
| C  | 1.8951860000  | 3.9510160000  | -1.6204090000 |
| H  | 2.6215510000  | 4.4430370000  | -2.2595270000 |
| C  | -4.6167950000 | 1.2878090000  | 3.5756670000  |
| H  | -5.3141340000 | 1.6078520000  | 4.3447780000  |
| C  | -3.6253720000 | -1.8389450000 | 1.6685680000  |
| H  | -3.9243910000 | -1.8803910000 | 0.6152660000  |
| H  | -4.2893170000 | -2.4951530000 | 2.2372410000  |
| H  | -2.6065980000 | -2.2344130000 | 1.7373630000  |
| C  | 3.6040920000  | -1.9210570000 | -1.6195970000 |
| H  | 3.8849470000  | -1.9224140000 | -0.5603320000 |
| H  | 4.2750470000  | -2.6008490000 | -2.1511600000 |
| H  | 2.5852280000  | -2.3167450000 | -1.6903410000 |
| C  | 3.7586900000  | 2.0593950000  | -3.1162670000 |
| H  | 3.7633220000  | 3.0790510000  | -3.4843660000 |
| C  | -3.8609090000 | 0.3949330000  | -2.0834150000 |
| C  | 3.7067430000  | 1.9135560000  | 1.6716650000  |
| H  | 3.8738770000  | 1.9667110000  | 0.5892760000  |
| H  | 4.4527690000  | 2.5453370000  | 2.1608330000  |
| H  | 2.7154200000  | 2.3345180000  | 1.8725950000  |

|   |               |               |               |
|---|---------------|---------------|---------------|
| C | 4.7805690000  | 0.0836120000  | 3.0320130000  |
| H | 5.5084360000  | 0.7954680000  | 3.4055580000  |
| C | 4.8202460000  | -1.2737290000 | 3.4223940000  |
| H | 5.5852330000  | -1.6192770000 | 4.1119300000  |
| C | 4.6205370000  | 1.1270870000  | -3.6414540000 |
| H | 5.3193710000  | 1.4120060000  | -4.4228720000 |
| C | 3.8910040000  | -2.1522040000 | 2.9311160000  |
| H | 3.9141510000  | -3.1926000000 | 3.2341860000  |
| C | -4.8664020000 | -1.3966850000 | -3.3297450000 |
| H | -5.6325880000 | -1.7599490000 | -4.0088100000 |
| C | -4.8502970000 | -0.0382020000 | -2.9446450000 |
| H | -5.5985250000 | 0.6569910000  | -3.3094080000 |
| C | -3.8018940000 | 1.8178530000  | -1.6016470000 |
| H | -4.0015370000 | 1.8683700000  | -0.5250960000 |
| H | -4.5414310000 | 2.4396530000  | -2.1130280000 |
| H | -2.8108570000 | 2.2521910000  | -1.7724540000 |

M2L2-11-et.xyz

|    |               |               |               |
|----|---------------|---------------|---------------|
| Mn | -1.4779740000 | 0.0727270000  | -0.1340070000 |
| Mn | 1.4950460000  | -0.0971820000 | 0.0186200000  |
| N  | 0.9857290000  | 1.9092260000  | -0.6588380000 |
| N  | 2.8451630000  | 0.3263040000  | -1.7120070000 |
| N  | -2.8923130000 | 0.5340720000  | 1.5956890000  |
| N  | -2.8344560000 | -0.3358560000 | -1.6774540000 |
| N  | 2.8560440000  | -0.4332010000 | 1.6237350000  |
| N  | 0.9278640000  | -1.9668860000 | 0.6701690000  |
| N  | -1.0072410000 | -1.9138590000 | -0.5489740000 |
| N  | -0.8826980000 | 1.9769050000  | 0.6501210000  |
| C  | 0.0948050000  | 2.6550700000  | 0.0208030000  |
| C  | -1.7723610000 | 2.6417760000  | 1.4450090000  |
| C  | 1.9425610000  | 2.5219780000  | -1.4217600000 |
| C  | -1.9923390000 | -2.5509240000 | -1.3390290000 |
| C  | 1.8677260000  | -2.6091520000 | 1.4934060000  |
| C  | -0.1444330000 | -4.0802500000 | 0.1607320000  |
| C  | 2.8683090000  | 1.6131130000  | -2.1205030000 |
| C  | 2.8674780000  | -1.7709550000 | 2.0341180000  |
| C  | -2.9216240000 | -1.7016720000 | -1.9716940000 |
| C  | -2.7953010000 | 1.7905810000  | 2.0806090000  |
| C  | -0.0775290000 | -2.6504360000 | 0.0944230000  |
| C  | 3.6753770000  | -0.5798240000 | -2.2551930000 |
| C  | -1.7202510000 | 4.0229860000  | 1.5798170000  |
| H  | -2.4410860000 | 4.5464510000  | 2.1972980000  |
| C  | 3.7837220000  | 0.4254640000  | 2.1259970000  |
| C  | 0.1782630000  | 4.0836800000  | 0.0694680000  |
| C  | -3.7268830000 | 0.5312990000  | -2.2290670000 |
| C  | 1.1888290000  | 4.6933990000  | -0.7035150000 |
| H  | 1.2847740000  | 5.7747590000  | -0.7031520000 |
| C  | -4.7224010000 | 0.1342430000  | -3.0859330000 |
| H  | -5.4109020000 | 0.8607740000  | -3.5043280000 |
| C  | 2.0523550000  | 3.9063960000  | -1.4609100000 |
| H  | 2.8275190000  | 4.3795810000  | -2.0526580000 |
| C  | -3.9544710000 | -2.1456960000 | -2.8600320000 |
| H  | -4.0315430000 | -3.1997870000 | -3.1063560000 |
| C  | -0.7587230000 | 4.7513760000  | 0.8819350000  |
| H  | -0.7266080000 | 5.8340560000  | 0.9568300000  |
| C  | -3.6233480000 | 2.2345800000  | 3.1140140000  |
| H  | -3.5214680000 | 3.2344420000  | 3.5185540000  |
| C  | 4.7509060000  | 0.0415340000  | 3.0232800000  |
| H  | 5.4677550000  | 0.7634950000  | 3.3999790000  |
| C  | 0.8074230000  | -4.7280730000 | 0.9879830000  |
| H  | 0.7612260000  | -5.8100260000 | 1.0932540000  |
| C  | -1.1521080000 | -4.7120680000 | -0.6162680000 |
| H  | -1.2121340000 | -5.7982560000 | -0.6209920000 |
| C  | -2.0331330000 | -3.9633980000 | -1.3684110000 |
| H  | -2.7876240000 | -4.4692460000 | -1.9627260000 |



|   |               |               |               |
|---|---------------|---------------|---------------|
| C | 1.7768540000  | -4.0074910000 | 1.6595510000  |
| H | 2.4890110000  | -4.5283260000 | 2.2918890000  |
| C | -4.8290660000 | -1.2535380000 | -3.4051490000 |
| H | -5.6061360000 | -1.5956980000 | -4.0838680000 |
| C | -3.5663980000 | 1.9702470000  | -1.8184890000 |
| H | -3.7120710000 | 2.0838540000  | -0.7372040000 |
| H | -4.2894600000 | 2.6143270000  | -2.3268040000 |
| H | -2.5596080000 | 2.3357410000  | -2.0554900000 |
| C | 3.7040100000  | 1.8405300000  | 1.6197280000  |
| H | 3.9255160000  | 1.8812440000  | 0.5465380000  |
| H | 4.4180050000  | 2.4887380000  | 2.1354510000  |
| H | 2.6991630000  | 2.2543320000  | 1.7635770000  |
| C | 3.8755650000  | -2.2064840000 | 2.9503940000  |
| H | 3.8962900000  | -3.2442510000 | 3.2679580000  |
| C | -3.8128940000 | -0.3121020000 | 2.0873980000  |
| C | 3.5996630000  | -1.9764600000 | -1.7101480000 |
| H | 3.8292500000  | -1.9838980000 | -0.6386430000 |
| H | 4.3060750000  | -2.6367920000 | -2.2189260000 |
| H | 2.5923980000  | -2.3881070000 | -1.8335020000 |
| C | 4.5655870000  | -0.2220960000 | -3.2637570000 |
| H | 5.2255550000  | -0.9681510000 | -3.6924970000 |
| C | 4.5885950000  | 1.0975070000  | -3.7050290000 |
| H | 5.2684480000  | 1.3972200000  | -4.4966250000 |
| C | 4.7936960000  | -1.3228220000 | 3.4364200000  |
| H | 5.5531900000  | -1.6542460000 | 4.1398090000  |
| C | 3.7372150000  | 2.0295840000  | -3.1330190000 |
| H | 3.7388220000  | 3.0572710000  | -3.4763260000 |
| C | -4.5676000000 | 1.3617870000  | 3.6320120000  |
| H | -5.2183110000 | 1.6816930000  | 4.4400820000  |
| C | -4.6707880000 | 0.0755370000  | 3.1146930000  |
| H | -5.4025010000 | -0.6261550000 | 3.4998890000  |
| C | -3.8878890000 | -1.6754710000 | 1.4657950000  |
| H | -4.2307060000 | -1.6011440000 | 0.4280910000  |
| H | -4.5796770000 | -2.3199630000 | 2.0134670000  |
| H | -2.9030180000 | -2.1520100000 | 1.4469510000  |

## References

- 1 P. D. Hall, M. A. Stevens, J. Y. J. Wang, L. N. Pham, M. L. Coote and A. L. Colebatch, *Inorg. Chem.*, 2022, **61**, 19333.
- 2 C. C. Scarborough and K. Wieghardt, *Inorg. Chem.*, 2011, **50**, 9773.
- 3 M. H. Chisholm, J. C. Huffman, I. P. Rothwell, P. G. Bradley, N. Kress and W. H. Woodruff, *J. Am. Chem. Soc.*, 1981, **103**, 4945.
- 4 E. Gore-Randall, M. Irwin, M. S. Denning and J. M. Goicoechea, *Inorg. Chem.*, 2009, **48**, 8304.
- 5 L. Echegoyen, A. DeCian, J. Fischer and J.-M. Lehn, *Angew. Chem. Int. Ed.*, 1991, **30**, 838.
- 6 H. Bock, J.-M. Lehn, J. Pauls, S. Holl and V. Krenzel, *Angew. Chem. Int. Ed.*, 1999, **38**, 952.
- 7 A. Bencini and D. Gatteschi, *EPR of Exchange Coupled Systems*, Dover Publications, Incorporated, 2012.
- 8 S. Stoll and A. Schweiger, *J. Magn. Reson.*, 2006, **178**, 42.
- 9 A. P. Golombek and M. P. Hendrich, *J. Magn. Reson.*, 2003, **165**, 33.
- 10 P. J. Pessiki, S. V. Khangulov, D. M. Ho and G. C. Dismukes, *J. Am. Chem. Soc.*, 1994, **116**, 891.
- 11 A. Hudson and M. J. de G. Kennedy, *Inorg. Nucl. Chem. Lett.*, 1971, **7**, 333.
- 12 J. Cheng, Q. Chen, X. Leng, Z. Ouyang, Z. Wang, S. Ye and L. Deng, *Chem*, 2018, **4**, 2844.
- 13 N. Cox, H. Ogata, P. Stolle, E. Reijerse, G. Auling and W. Lubitz, *J. Am. Chem. Soc.*, 2010, **132**, 11197.
